1        **Insight into glycosphingolipid crypticity: Crystal structure of the anti-**  
2        **tumor antibody 14F7 and recognition of NeuGc GM3 ganglioside**

3

4        Kaare Bjerregaard-Andersen<sup>1,8#</sup>, Hedda Johannesen<sup>1,2#</sup>, Fana Abraha<sup>3,8</sup>, Aleksandra  
5        Šakanović<sup>4</sup>, Daniel Großer<sup>5,6</sup>, Ünal Coskun<sup>5,6</sup>, Gregor Anderluh<sup>4</sup>, Stefan Oscarson<sup>3</sup>,  
6        Ernesto Moreno<sup>7\*</sup>, Michal Grzybek<sup>5,6\*</sup>, Ute Krengel<sup>1\*</sup>

7

8

9        <sup>1</sup> Department of Chemistry, University of Oslo, NO-0315 Oslo, Norway

10       <sup>2</sup> Department of Biosciences, University of Oslo, NO-0316 Oslo, Norway

11       <sup>3</sup> School of Chemistry, University College Dublin, Belfield, Dublin 4, Ireland

12       <sup>4</sup> Department of Molecular Biology and Nanobiotechnology, The National Institute of  
13       Chemistry, 1000, Ljubljana, Slovenia

14       <sup>5</sup> Paul Langerhans Institute Dresden of the Helmholtz Zentrum Munich at the  
15       University Hospital and Faculty of Medicine Carl Gustav Carus of Technische  
16       Universität Dresden, Dresden, Germany

17       <sup>6</sup> German Center for Diabetes Research (DZD e.V.), Neuherberg, Germany

18       <sup>7</sup> Facultad de Ciencias Básicas, Universidad de Medellín, Medellín, Colombia

19       <sup>8</sup> Present addresses: Kaare Bjerregaard-Andersen, H. Lundbeck A/S, Valby,  
20       Denmark; Fana Abraha, Recipharm OT Chemistry, Uppsala, Sweden

21

22       #Authors contributed equally

23       \*Correspondence: Ernesto Moreno (emoreno@udem.edu.co); Michal Grzybek  
24       (michal.grzybek@tu-dresden.de) and Ute Krengel (ute.krengel@kjemi.uio.no)

25

26

27       **Keywords:** anti-tumor antibody; carbohydrate-antibody interactions; carbohydrate-  
28       carbohydrate stacking; gangliosides; glycosphingolipid crypticity; lipid rafts;  
29       liposomes; *N*-glycolyl GM3; protein-carbohydrate interactions; X-ray crystal structure

30 **Abstract**

31 Tumor-associated glycolipids such as NeuGc GM3 are auspicious molecular targets in  
32 antineoplastic therapies and vaccine strategies. 14F7 is an anti-tumor antibody with  
33 high clinical potential, which has extraordinary specificity for NeuGc GM3, but does  
34 not recognize the very similar, ubiquitous NeuAc GM3. Here we present the 2.3 Å  
35 crystal structure of the 14F7 binding domain (14F7 scFv) in complex with the NeuGc  
36 GM3 trisaccharide. Intriguingly, a water molecule appears to shape the specificity of  
37 14F7. Using model membrane systems, we show that 14F7 recognizes NeuGc GM3  
38 only above lipid concentrations that are likely to form glycolipid-rich domains. This  
39 “all-or-nothing” effect was exacerbated in giant unilamellar vesicles and multilamellar  
40 vesicles, whereas no binding was observed to 100 nm liposomes, emphasizing that the  
41 14F7–NeuGc GM3 interaction is additionally modulated by membrane curvature.  
42 Unexpectedly, adding NeuAc GM3 strongly increased binding affinity to NeuGc GM3-  
43 containing liposomes. This effect may be important for tumor recognition, where the  
44 ubiquitous NeuAc GM3 may enhance 14F7 binding to NeuGc GM3-expressing cancer  
45 cells.

46

## 47 **Introduction**

48 Cancer cells differ from healthy cells by aberrant glycosylation patterns, displaying  
49 tumor-associated carbohydrate antigens (TACAs)<sup>1-3</sup>. Immunotherapy offers the  
50 possibility of specifically targeting TACAs with high affinity through structure-based  
51 engineering of monoclonal antibodies<sup>4-6</sup>. The monoclonal antibody (mAb) 14F7 is an  
52 IgG<sub>1</sub> raised by immunizing a BALB/c mouse with *N*-glycolyl GM3 (NeuGc GM3)  
53 complexed with very low-density lipoproteins (VLDLs)<sup>7</sup>. This antibody is known for  
54 its exquisite specificity and high affinity to NeuGc GM3, determined by ELISA to be  
55 in the low nanomolar range<sup>7-9</sup>. 14F7 has been used to verify the presence of the NeuGc  
56 GM3 in a range of tumors including retinoblastoma<sup>10</sup>, non-small cell lung cancer<sup>11</sup>,  
57 colon cancer<sup>12</sup>, breast cancer<sup>7,13</sup> and melanoma<sup>7</sup>. Humanizing the mAb yielded 14F7hT  
58 (here referred to as 14F7 mAb), which retained its original ability to induce antibody-  
59 dependent cellular cytotoxicity in both human and murine NeuGc GM3-expressing  
60 cells<sup>14,15</sup>. 14F7 mAb has been reported to kill primary tumor cells by a complement-  
61 independent mechanism<sup>16,17</sup>, however, the details of its mode of action are unknown.

62 The ability of 14F7 to effectively differentiate between the highly similar NeuGc and  
63 NeuAc epitopes is intriguing. In fact, the two glycolipids only differ by the presence of  
64 one additional oxygen atom (H to OH) present in NeuGc GM3 (Figure 1A). Mutational  
65 studies have highlighted key residues involved in NeuGc binding<sup>18</sup>. The structural basis  
66 of the discrimination between NeuGc and NeuAc GM3 has, however, remained elusive.  
67 Partial understanding has been gained through the crystal structure of the 14F7 Fab<sup>19</sup>  
68 and the more recent structure of a 14F7-derived single-chain variable fragment (scFv)  
69 harboring an alternative light chain<sup>9</sup>. Both 14F7 formats feature a long CDR H3 loop,  
70 which exhibits key residues for antigen binding.

71 NeuGc GM3 is composed of a ceramide tail, buried in the plasma membrane of the cell,  
72 and an exposed trisaccharide head group featuring the sialic acid NeuGc at its tip<sup>20</sup>.  
73 While NeuGc GM3 is expressed in most mammals, it is absent from healthy adult  
74 human cells due to a partial deletion in the cytidine monophosphate-*N*-  
75 acetylneuraminic acid hydroxylase (*CMAH*) gene converting NeuAc to NeuGc<sup>21,22</sup>.  
76 However, dietary uptake of NeuGc GM3, *e.g.*, from meat, can lead to low levels present  
77 in healthy tissue<sup>23-27</sup>. This in turn leads to a low level of autoantibodies, and NeuGc  
78 GM3 is therefore referred to as a xeno-autoantigen<sup>28</sup>. In contrast to NeuGc GM3, its *N*-  
79 acetyl counterpart is found ubiquitously in human cells and plays a role in control of

80 numerous cellular signaling pathways<sup>29,30</sup>. NeuAc GM3 has also been shown to interact  
81 with integral membrane proteins, such as the insulin receptor<sup>31</sup>, or the epidermal growth  
82 factor receptor<sup>32,33</sup>. By mechanisms that are not yet well understood<sup>23,28,34-37</sup>, NeuGc  
83 GM3 is displayed to a larger extent by certain cancer cells and thus represents an  
84 attractive TACA.

85 Here we present the X-ray crystal structure of the scFv–NeuGc complex, elucidating  
86 the molecular basis for its discrimination between NeuAc and NeuGc GM3. Analysis  
87 of the crystal structure has been expanded through molecular modeling to propose an  
88 alternative binding mode of the GM3 lactose moiety that better explains previous  
89 mutagenesis data. Furthermore, our binding experiments of the 14F7 mAb and scFv to  
90 NeuGc GM3 reconstituted in liposomes show that the antibodies efficiently recognize  
91 the ganglioside only at high concentrations. Interestingly, the presence of NeuAc GM3  
92 potentiates antibody recognition of NeuGc GM3, suggesting that 14F7 mAb and scFv  
93 can be potent tools for targeting low molar concentrations of the NeuGc GM3 antigen  
94 in NeuAc GM3-expressing cells.

95

## 96 **Results**

### 97 **Crystal structure of 14F7 scFv in complex with NeuGc GM3 trisaccharide**

98 The structure of the 14F7 scFv in complex with the NeuGc GM3 trisaccharide was  
99 determined to 2.3 Å resolution from a single trisaccharide-soaked crystal. Data  
100 collection and refinement statistics are summarized in

101 Table 1. The crystal was obtained from the same batch of crystallization setups that  
102 earlier yielded the scFv apo-structure (PDB ID: 6FFJ<sup>9</sup>) and retained  $P2_1$  symmetry upon  
103 soaking, with similar unit cell parameters and four scFv molecules in the asymmetric  
104 unit. Two of the four molecules (chains A and B) were well defined by electron density  
105 in the CDR regions and could be modeled without breaks, whereas parts of CDR H3  
106 could not be traced in chains C and D. One of the molecules (chain A) contained  
107 additional electron density corresponding to the trisaccharide ligand (Figure 1B).  
108 Inspection of the ligand complex revealed that only the sialic acid component (NeuGc)  
109 of the trisaccharide interacts with the antibody (Figure 1C), whereas the glucose moiety  
110 extends outwards towards the solvent, where it makes contacts with residues of a  
111 neighboring scFv within the same crystallographic asymmetric unit. In this binding  
112 mode, the glycosidic linkage between NeuGc and Gal adopts a synclinal  
113 conformation<sup>38</sup>.

114 Overall, the structure of the scFv–NeuGc GM3 trisaccharide complex is highly similar  
115 to the previously published scFv apo-structure<sup>9</sup>, with an average r.m.s.d. value of 0.6 Å  
116 for C $\alpha$  atoms indicating very little structural change upon binding (Figure 1B). Also,  
117 the side chain conformations of amino acid residues in proximity of the saccharide  
118 binding site are very similar between the scFv complex and the apo-structure. Tyr32  
119 and Tyr100<sub>D</sub>, both in direct contact with the ligand through H-bonds, shift by  
120 approximately 1 Å to accommodate binding. Most noticeably, Arg98 adopts a new  
121 conformation upon ligand binding, where it stacks against the sialic acid residue of the  
122 NeuGc GM3 trisaccharide (Figure 1C and D).

123

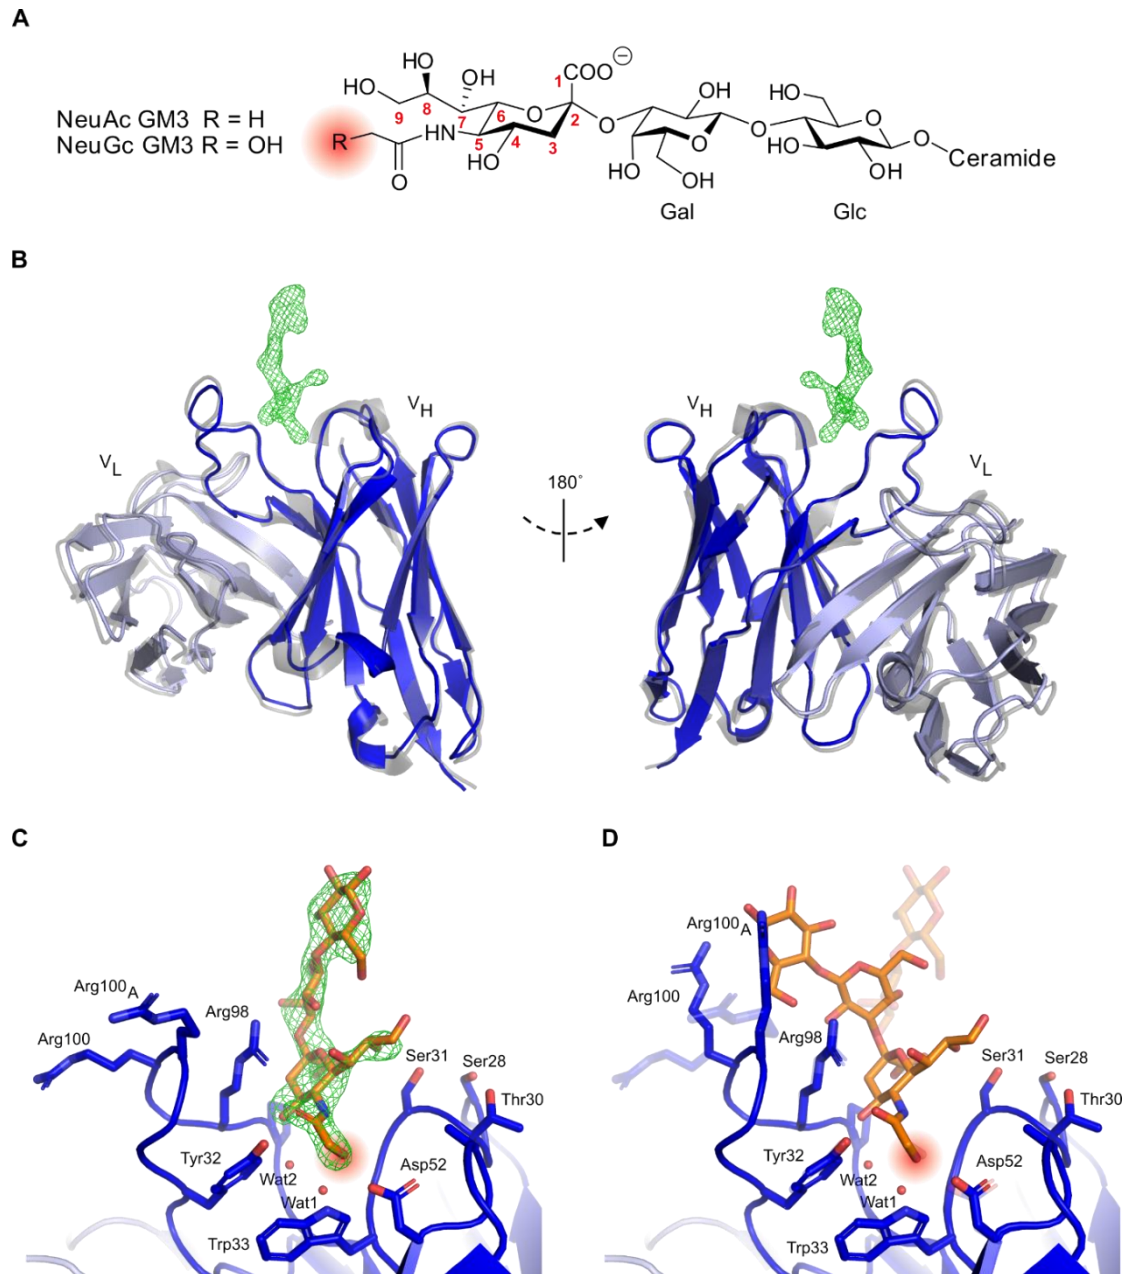

124

**Figure 1. 14F7 scFv complex with NeuGc GM3 trisaccharide.** **A** Ganglioside structure. Neu5Gc GM3 is a xeno-antigen with a very similar structure to the common cellular glycolipid Neu5Ac GM3. The only difference consists of an additional oxygen atom in the *N*-glycolyl group of NeuGc compared to the *N*-acetyl group of NeuAc (highlighted in salmon) in the context of the trisaccharide Neu $\alpha$ 2-3Gal $\beta$ 1-4Glc $\beta$ . **B** 14F7 scFv light (light blue) and heavy (dark blue) chains (PDB ID: 6S2I, chain A; this work). The 14F7 scFv apo-structure (PDB ID: 6FFJ<sup>9</sup>, chain A) is superimposed in grey. Difference electron density ( $mF_o - DF_c$ ) for the carbohydrate ligand is shown at 3.0  $\sigma$  (green mesh). **C** Structural model of 14F7scFv—NeuGc trisaccharide complex (synclinal conformation). Key amino acid residues and water molecules interacting with the glycan (orange) are labeled. **D** Alternative conformation of NeuGc GM3 trisaccharide with anticlinal glycosidic linkage between NeuGc and Gal (modeled), which buries a larger surface area on 14F7 scFv compared to the synclinal conformation observed in the crystal structure (transparent). Panel A was prepared with ChemDraw, panels B-D with PyMOL 2.2.0.

Table 1. Crystallographic data collection and refinement statistics

| 14F7 scFv – NeuGc complex (PDB ID: 6S2I)* |                         |                                |                       |
|-------------------------------------------|-------------------------|--------------------------------|-----------------------|
| <b>Data collection</b>                    |                         | <b>Refinement</b>              |                       |
| Beam line                                 | ID30A-3, ESRF           | Resolution (Å)                 | 62.9-2.29 (2.34-2.29) |
| Wave length (Å)                           | 0.9677                  | No. unique reflections         | 42066 (2675)          |
| Space group                               | $P 2_1$                 | No. reflections in test set    | 2151 (126)            |
| Unit cell parameters                      |                         | $R$ -work / $R$ -free          | 0.220 / 0.255         |
| $a, b, c$ (Å)                             | 63.9 113.7 67.0         | No. atoms                      |                       |
| $\alpha, \beta, \gamma$ (°)               | 90 91.2 90              | Protein                        | 7239                  |
| Solvent content (%)                       | 51.0                    | Water                          | 103                   |
| Resolution (Å)                            | 62.9-2.29 (2.34-2.29)** | Ligand                         | 44                    |
| $R_{\text{sym}}$ (%)                      | 9.7 (69.7)              | $B$ -factors (Å <sup>2</sup> ) |                       |
| $R_{\text{meas}}$ (%)                     | 11.1 (76.8)             | Protein                        | 52.1                  |
| $I / \sigma(I)$                           | 9.3 (2.1)               | Water                          | 48.6                  |
| Completeness (%)                          | 98.8 (99.2)             | Ligand                         | 52.0                  |
| Multiplicity                              | 4.2 (4.4)               | R.m.s. deviations              |                       |
| CC 1/2                                    | 0.99 (0.83)             | Bond lengths (Å)               | 0.002                 |
| Wilson $B$ -factor (Å <sup>2</sup> )      | 44.0                    | Bond angles (°)                | 0.6                   |
|                                           |                         | Ramachandran plot              |                       |
|                                           |                         | Favored (%)                    | 97.3                  |
|                                           |                         | Allowed (%)                    | 2.7                   |
|                                           |                         | Outliers (%)                   | 0.0                   |

125 \*Data collected on a single crystal.

126 \*\*Values in parentheses are for high-resolution shell.

### 127 Structural basis for 14F7 discrimination between NeuGc and NeuAc GM3

128 The interactions between 14F7 and the NeuGc GM3 trisaccharide are shown in  
 129 Figure 2A and listed in Table 2. 14F7 has repeatedly been shown to strongly  
 130 differentiate between NeuGc and NeuAc GM3 *in vitro*, e.g., probed by ELISA<sup>7,9</sup>.  
 131 Therefore, the key determinant for discrimination must be found in the trisaccharide  
 132 head group, where the only difference is the presence of an additional hydroxyl group  
 133 in the *N*-glycolyl moiety of the sialic acid. Intriguingly, the *N*-glycolyl hydroxyl group  
 134 does not itself provide any direct interaction with the scFv, except for a backbone  
 135 interaction with Tyr32, but manifests its presence through a water molecule (Wat1;  
 136 Figure 2A). Wat1 is part of a hydrated pocket coordinated by Trp33 and is also present  
 137 in the 14F7 scFv apo-structure (PDB ID: 6FFJ<sup>9</sup>), thus it may be regarded as an extension  
 138 of CDR H1. Wat1 not only interacts with the *N*-glycolyl hydroxyl group of NeuGc, but  
 139 also with its 4-OH group, *via* a second water molecule (Wat2), which binds to the  
 140 backbone oxygen of Ser96. On the protein side, Wat1 establishes an H-bond with the  
 141 backbone NH of Trp33 and a weaker, out-of-plane H-bond with the aromatic  $\pi$  face of  
 142 its indole pyrrole ring. Mutagenesis of Trp33 reveals that specificity is only maintained  
 143 when this residue is exchanged by another aromatic residue, *i.e.*, Phe and Tyr<sup>18</sup>.

144 Especially the possible replacement by Phe emphasizes the importance of the aromatic  
145 interaction with Wat1. This trisaccharide-water complex, unable to form with NeuAc,  
146 places itself like a cassette into the bottom of the binding pocket formed by the  
147 backbone and side chains of Ser31, Tyr32, Pro97, Arg98 and Tyr100<sub>D</sub>. The difference  
148 in energetic contribution to binding of this exciting water-mediated ligand binding site  
149 remains to be explored.

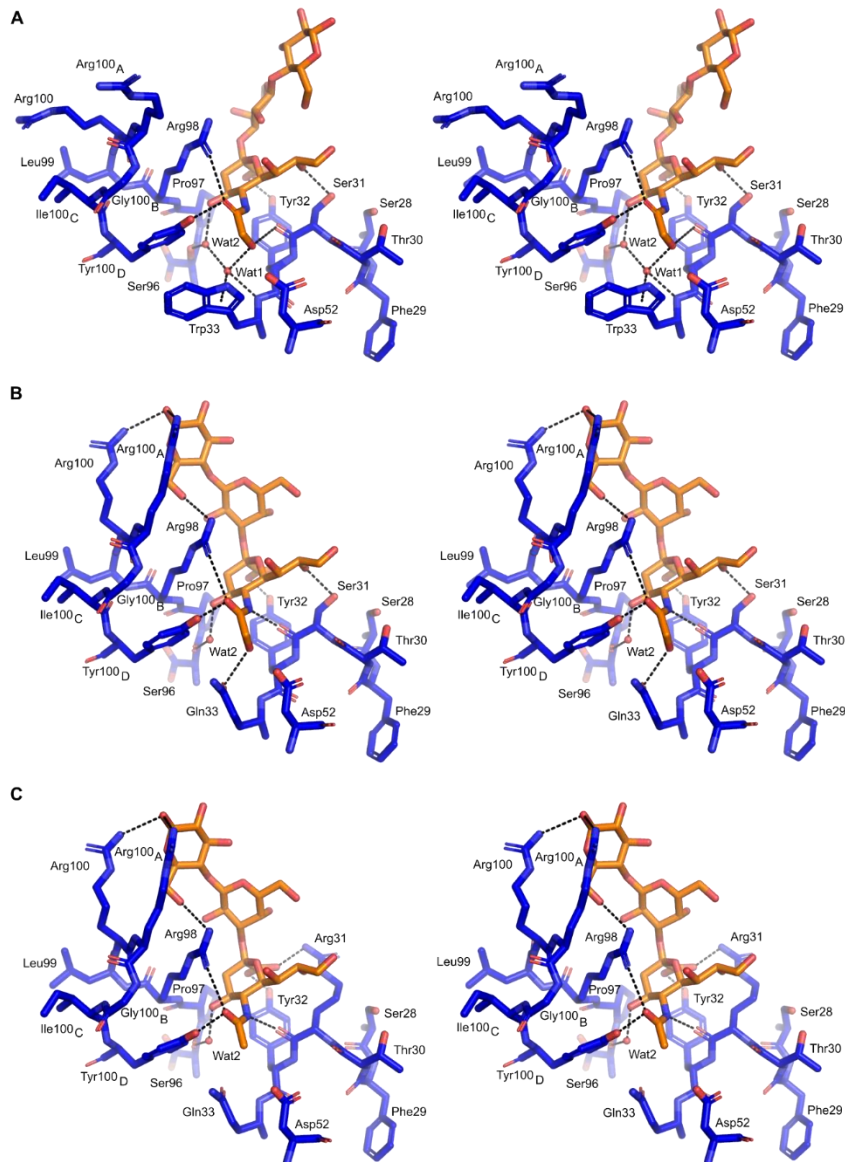

150

**Figure 2. Stereo pictures showing the specificity of Trp33, W33Q and W33Q/S31R 14F7 variants in complex with NeuGc or NeuAc.** **A** Crystal structure of 14F7 Trp33 (blue) bound to NeuGc (orange) in its experimentally determined conformation (PDB ID: 6S2I, chain A; this work). **B** Model of 14F7 W33Q variant, with NeuGc in the *in silico*-optimized anticlinal conformation. **C** Model of the cross-reactive 14F7 S31R/W33Q variant, with NeuAc in the anticlinal conformation. The figure was prepared with PyMOL 2.0.0.



Table 2. Protein-carbohydrate interactions.

| Synclinal (crystal) conformation    |                                      |           | Anticlinal (modeled) conformation |                                      |           |                              |           |     |
|-------------------------------------|--------------------------------------|-----------|-----------------------------------|--------------------------------------|-----------|------------------------------|-----------|-----|
| Sugar Residue-Atom                  | Protein Amino acid-Atom <sup>a</sup> | Dist. (Å) | Sugar Residue-Atom                | Protein Amino acid-Atom <sup>a</sup> | Dist. (Å) |                              |           |     |
| SIA-O1A                             | Tyr32-OH                             | 2.5       | <i>Idem</i>                       |                                      |           |                              |           |     |
| SIA-O1A                             | Pro97-CB                             | 3.4       |                                   |                                      |           |                              |           |     |
| SIA-O1B                             | Tyr32-OH                             | 3.1       |                                   |                                      |           |                              |           |     |
| SIA-C3                              | Tyr32-CE1                            | 4.4       |                                   |                                      |           |                              |           |     |
| SIA-C3                              | Arg98-NE                             | 4.0       |                                   |                                      |           |                              |           |     |
| SIA-C4                              | Tyr32-CD1                            | 4.2       |                                   |                                      |           |                              |           |     |
| SIA-O4                              | Wat2                                 | 2.4       |                                   |                                      |           |                              |           |     |
| SIA-O4                              | Arg98-N                              | 2.9       |                                   |                                      |           |                              |           |     |
| SIA-O4                              | Arg98-CG                             | 3.4       |                                   |                                      |           |                              |           |     |
| SIA-O4                              | Arg98-CD                             | 3.4       |                                   |                                      |           |                              |           |     |
| SIA-C5                              | Arg98-CZ                             | 4.5       |                                   |                                      |           |                              |           |     |
| SIA-N5                              | Ser31-O                              | 2.8       |                                   |                                      |           |                              |           |     |
| SIA-O5                              | Tyr100 <sub>D</sub> -OH              | 2.6       |                                   |                                      |           |                              |           |     |
| SIA-C5A                             | Tyr100 <sub>D</sub> -CE1             | 3.6       |                                   |                                      |           |                              |           |     |
| SIA-OGc                             | Wat1                                 | 2.4       |                                   |                                      |           |                              |           |     |
| SIA-OGc                             | Ser31-O                              | 3.4       |                                   |                                      |           |                              |           |     |
| SIA-OGc                             | Trp33-NE1                            | 3.3       |                                   |                                      |           |                              |           |     |
| SIA-OGc                             | Tyr32-CA                             | 3.7       |                                   |                                      |           |                              |           |     |
| SIA-C6                              | Ser31-O                              | 3.3       |                                   |                                      |           |                              |           |     |
| SIA-C7                              | Ser31-CB                             | 4.4       |                                   |                                      |           |                              |           |     |
| SIA-C7                              | Ser31-CG                             | 4.4       |                                   |                                      |           |                              |           |     |
| SIA-O8                              | Ser31-OG                             | 2.8       |                                   |                                      |           |                              |           |     |
| SIA-O8                              | Arg23-NH1 #                          | 2.9       |                                   |                                      |           |                              |           |     |
| SIA-O5                              | Arg98-NH1                            | 3.2       |                                   |                                      |           |                              |           |     |
| Absent                              |                                      |           |                                   |                                      |           | Crystal contact not relevant |           |     |
|                                     |                                      |           |                                   |                                      |           | SIA-O5                       | Arg98-NH1 | 2.7 |
|                                     |                                      |           | SIA-O7                            | Arg98-NH1                            | 3.1       |                              |           |     |
|                                     |                                      |           | GAL-O1                            | Arg100 <sub>A</sub> -NH2             | 2.9       |                              |           |     |
|                                     |                                      |           | GAL-O2                            | Arg98-NE                             | 4.1       |                              |           |     |
|                                     |                                      |           | GAL-O5                            | Arg100 <sub>A</sub> -NE              | 3.6       |                              |           |     |
|                                     |                                      |           | GLC-O1                            | Arg100-NH2                           | 3.2       |                              |           |     |
|                                     |                                      |           | GLC-O5                            | Arg100-NE                            | 3.8       |                              |           |     |
|                                     |                                      |           | GLC-C6                            | Arg100-CG                            | 4.1       |                              |           |     |
|                                     |                                      |           | GLC-O6                            | Arg98-NH2                            | 3.5       |                              |           |     |
| GLC-O6                              | Arg98-NE                             | 3.7       |                                   |                                      |           |                              |           |     |
| GLC-O6                              | Arg100 <sub>A</sub> -CG              | 3.6       |                                   |                                      |           |                              |           |     |
| GLC-O6                              | Arg100 <sub>A</sub> -N               | 4.1       |                                   |                                      |           |                              |           |     |
| GLC-O1                              | Ser74-O #                            | 2.5       | Crystal contacts not relevant     |                                      |           |                              |           |     |
| GLC-O5                              | Asn76-ND2 #                          | 3.3       |                                   |                                      |           |                              |           |     |
| Buried protein surface <sup>b</sup> |                                      |           |                                   |                                      |           |                              |           |     |
| 218 Å <sup>2</sup>                  |                                      |           | 293 Å <sup>2</sup>                |                                      |           |                              |           |     |

151 Atomic contacts between sugar and protein/water atoms for the synclinal (crystal) and anticlinal  
152 (modeled) conformations, defined by the sialic acid-galactose *glycosidic linkage*. Packing contacts with  
153 distances up to 4.5 Å were also included in the table. Contacting carbon atoms are shaded in light gray.  
154 <sup>a</sup> Amino acid atom names follow PDB conventions, # marks a neighboring molecule in the crystal.  
155 <sup>b</sup> In these calculations, the two buried waters were considered part of the protein. The contribution of the  
156 neighboring chain (#), due to crystal packing, was not included in the calculations.

157

158

## 159 **Alternative trisaccharide binding mode**

160 In the crystal, NeuGc GM3 adopts synclinal torsion angles between NeuGc and Gal. In  
161 solution, a common alternative conformation of the NeuGc GM3 trisaccharide has an  
162 anticlinal glycosidic linkage. Reasoning that crystal packing might have forced the  
163 orientation of the lactose moiety of NeuGc GM3 into the conformation observed in the  
164 crystal structure, we modeled an alternative binding mode for the trisaccharide, where  
165 NeuGc remained exactly as in the crystal structure, but the two torsion angles of its  
166 glycosidic linkage with galactose adopt the anticlinal conformation (Figure 1D). We  
167 found that this binding geometry, which is hindered by the crystal packing, brings  
168 additional favorable contacts between the trisaccharide and CDR-H3, including  
169 interactions between both Arg100 and Arg100<sub>A</sub> with the trisaccharide glucose residue  
170 (Table 2). It also increases the buried surface area by more than one third, from 218 Å<sup>2</sup>  
171 to 293 Å<sup>2</sup>. Furthermore, in this binding mode, Arg98 becomes more tightly packed  
172 against the trisaccharide (Figure 1D, Figure 2AB). This is in good agreement with  
173 mutagenesis data showing the critical role of this amino acid, which did not tolerate any  
174 substitution<sup>18</sup>.

175

## 176 **Models of 14F7 variants explore functional mapping data**

177 In previous work, we used phage display to perform extensive mutagenesis studies on  
178 the 14F7 heavy chain CDRs<sup>18</sup>. These studies identified several positions in CDRs H1  
179 and H3 as important for recognizing NeuGc GM3, *e.g.* Trp33, Asp52, Arg98, Arg100,  
180 Arg100<sub>A</sub> and Tyr100<sub>D</sub>. In addition we found that several single residue substitutions,  
181 yielding *e.g.*, S28R, T30R, S31R and W33Q conferred different levels of cross-  
182 reactivity to the antibody; and some double or triple combinations even raised the  
183 affinity to NeuAc GM3 to the same level as for NeuGc GM3<sup>18</sup>. Here we modeled one  
184 of these variants (W33Q) in complex with NeuGc GM3 (Figure 2B) and another  
185 (S31R/W33Q) in complex with NeuAc GM3 (Figure 2C), in order to interpret the  
186 mutagenesis data. The introduction of an arginine residue in the antigen binding site is  
187 likely to yield a salt bridge with the sialic acid carboxylate. Gln33 (as in W33Q)  
188 probably interacts directly with the *N*-glycolyl OH of NeuGc GM3, replacing Wat1  
189 (Figure 2B).

190

191 **14F7 binding to NeuGc GM3 occurs only at high glycolipid densities**

192 To better understand the mode of interaction between 14F7 and NeuGc GM3 in the  
193 lipid bilayer, we performed a series of binding experiments using different model  
194 membrane systems. First, we chemically labeled 14F7 mAb and scFv with fluorescent  
195 dyes and tested their binding to giant unilamellar vesicles (GUVs) containing various  
196 amounts of NeuGc or NeuAc GM3 in a background of DOPC and cholesterol  
197 (Figure 3). Below 2 % NeuGc GM3, no binding to GUVs was detected. Even upon  
198 increasing the glycolipid concentration from 2 % to 5 % NeuGc GM3, only ~3 % of all  
199 vesicles showed antibody binding. However, when 10 % NeuGc GM3 was used for  
200 GUV formation, all vesicles were labeled (Figure 3), suggesting that 14F7 mAb is not  
201 capable of recognizing individual NeuGc GM3 glycolipids as antigens. Upon  
202 surpassing a critical glycolipid density threshold, however, antigen recognition  
203 becomes highly efficient. In contrast, no binding was observed for 10 % NeuAc,  
204 confirming the specificity of 14F7 (Figure 3).

205

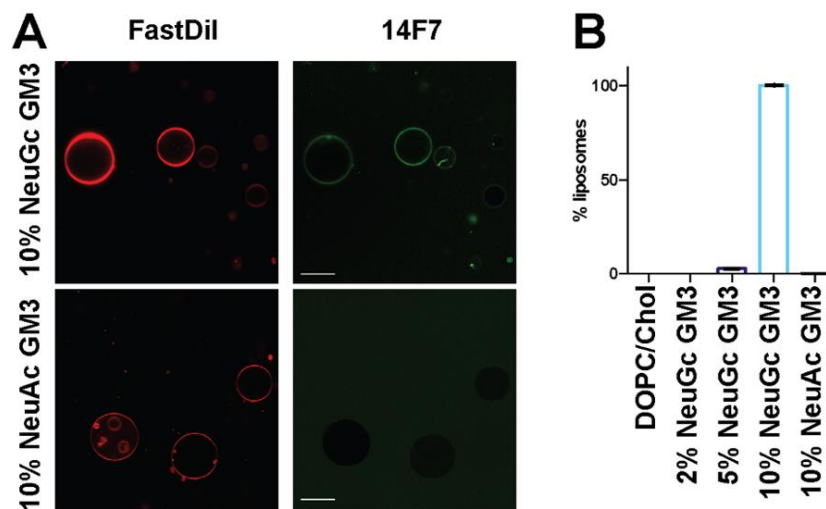

206

207 **Figure 3. Binding of 14F7 to GUVs composed of DOPC/Chol/GM3.** a 14F7 was chemically  
208 labeled with Dylight-488 (green) and was added to GUVs containing FastDiI as a membrane  
209 marker (red). The scale bar corresponds to 20  $\mu$ m. b Percentage of GUVs showing binding of  
210 14F7-488. Representative images for all lipid compositions are shown in Figure S1.

211

212 The experiment was repeated with fluorescently labeled 14F7 scFv instead of 14F7  
213 mAb, however, no binding was observed, even at high NeuGc concentrations. To test  
214 whether this failure in binding was related to loss of function in the 14F7 scFv or an

215 artifact of chemical labeling, we performed differential-scanning calorimetry  
216 (nanoDSF) of the unlabeled and labeled scFv fragment (Figure S3). After chemical  
217 labeling with Dylight488-NHS, the  $T_m$  of 67 °C for the native 14F7 scFv flattened and  
218 shifted its maximum to 72 °C (Figure S3). In addition, the scattering of the solution  
219 increased substantially, suggesting that the sample becomes polydisperse. Both of these  
220 results indicate an overall change in the structure of the scFv upon labeling that  
221 probably also perturbs the binding site. We therefore opted for liposomal flotation  
222 experiments that do not require labeling of the protein.

223

### 224 **Membrane curvature can affect NeuGc GM3 presentation**

225 To test if both 14F7 mAb and scFv can recognize NeuGc GM3-containing liposomes,  
226 we performed flotation assays with unlabeled protein. Large unilamellar vesicles  
227 (LUVs) have an advantage over GUVs in that they form more homogenous liposome  
228 populations due to their preparation method, using freeze-thaw cycles, followed by  
229 multiple extrusions through polycarbonate filters. After the flotation assay, the  
230 gradients were fractionated from top to bottom, and binding of 14F7 to vesicles was  
231 detected by Western blotting. Antibody binding to LUVs is indicated by its presence in  
232 the top, low-density fractions (fractions 2-4), otherwise, the protein would be pelleted  
233 at the bottom (fractions 10-11) (Figure 4A). In the initial experiment, LUVs containing  
234 10 % NeuGc GM3 were used, but only a small portion of either 14F7 mAb or scFv was  
235 detected in the liposome-containing fractions, suggesting a very weak interaction with  
236 the LUVs (Figure 4BC). Thin layer chromatography (TLC) analysis of the liposomes  
237 recovered after flotation confirmed the presence of NeuGc GM3 in the vesicles, thus  
238 the weak binding was puzzling. The major difference between the LUVs and the  
239 liposomes used in the fluorescent study (GUVs) was their size (Figure 4D). Therefore,  
240 we repeated the flotation experiment using non-extruded, multilamellar liposomes  
241 (MLVs), which correspond in size to the GUVs. Interestingly, strong binding for both  
242 14F7 mAb and scFv was observed for the MLVs, suggesting that membrane curvature  
243 plays an important role for antigen recognition (Figure 4BC). A comparative analysis  
244 of lipid composition of both LUVs and MLVs confirmed that in both cases the  
245 composition of the vesicles was the same (Figure 4E). In fact, the amount of NeuGc  
246 GM3 that was available for binding should be much higher in LUVs than in MLVs, as  
247 only the outermost membrane leaflet can be probed by the antibodies. When NeuAc

248 GM3 was used in either LUVs or MLVs, no binding was observed, neither for 14F7  
249 mAb nor for scFv, again confirming the high specificity of 14F7 (Figure S2).

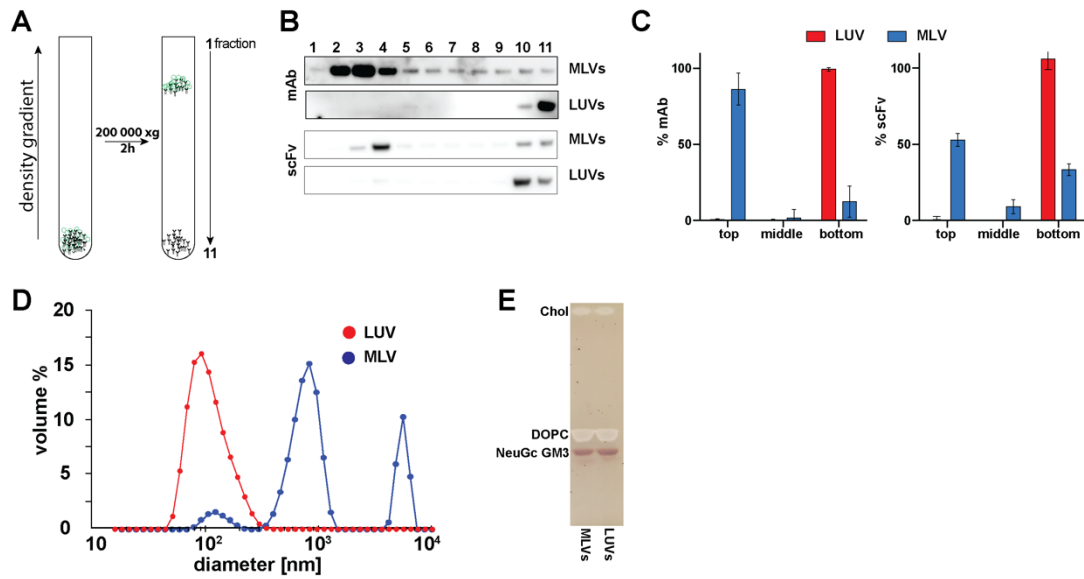

250

**Figure 4. Binding of 14F7 to LUVs and MLVs composed of DOPC/Chol/NeuGc GM3 in flotation assays.** **A** Setup of the LUV flotation assay. After the centrifugation, 11 fractions were collected from the top. Proteins bound to vesicles accumulate in fractions 2-4, while unbound proteins are in the bottom fractions (10-11) **B** Representative Western blot of fractions collected after flotation. **C** Binding was quantified using the AIDA software as follows: top (fractions 1-4), middle (5-8) and bottom (9-11). Error bars represent standard deviations of three independent experiments. **D** Dynamic light-scattering measurement of the size of the vesicles used in the flotation assay. **E** Thin layer chromatography (TLC) of lipids extracted from the vesicles after flotation (combined fractions 2-4). The lipids were stained with orcinol.

### 251 NeuAc GM3 potentiates 14F7 binding to NeuGc GM3

252 We decided to probe 14F7 mAb and scFv binding to MLVs containing various NeuGc  
253 GM3 concentrations (0-10 %) by electrochemiluminescence immunoassay (EIA), and  
254 also tested combinations of NeuGc and NeuAc GM3. The  $K_D$  values for vesicles  
255 containing 10 % NeuGc GM3 were estimated to be approximately 34 nM and 3.4  $\mu$ M  
256 for 14F7 mAb and scFv, respectively by EIA (Figure 5AB), representing a large gain  
257 in apparent affinity (approximately 100-fold) for the mAb *versus* the scFv, in contrast  
258 to the previous ELISA studies<sup>8,9</sup>. Interestingly, NeuGc GM3 binding and recognition  
259 by 14F7 greatly increased when NeuAc GM3 was introduced into the same vesicles,  
260 *e.g.*, binding of both 14F7 mAb and scFv to liposomes containing a mixture of 2 %  
261 NeuGc and 8 % NeuAc GM3 was significantly higher compared to liposomes  
262 containing only 2 % NeuGc. In fact, 14F7 scFv bound equally strongly to vesicles  
263 containing 5 % NeuGc or a 2/8 % mixture of NeuGc and NeuAc GM3. For 14F7 mAb,

264 binding to the 2/8 % mixture even exceeded the binding efficiency observed for vesicles  
265 containing 5 % pure NeuGc GM3. This effect of potentiation was also observed for  
266 liposomes containing an equal molar ratio of NeuGc/NeuAc GM3 (5/5 %), which  
267 showed higher binding efficiency compared to vesicles that only contained 5 %  
268 NeuGc GM3 (Figure 5AB). Similar results were obtained by surface plasmon  
269 resonance (SPR) spectroscopy (Figure 5C). This demonstrates that not only the amount  
270 of NeuGc GM3, but also the overall GM3 ganglioside concentration affects the ability  
271 of 14F7 to recognize and bind NeuGc GM3.

272

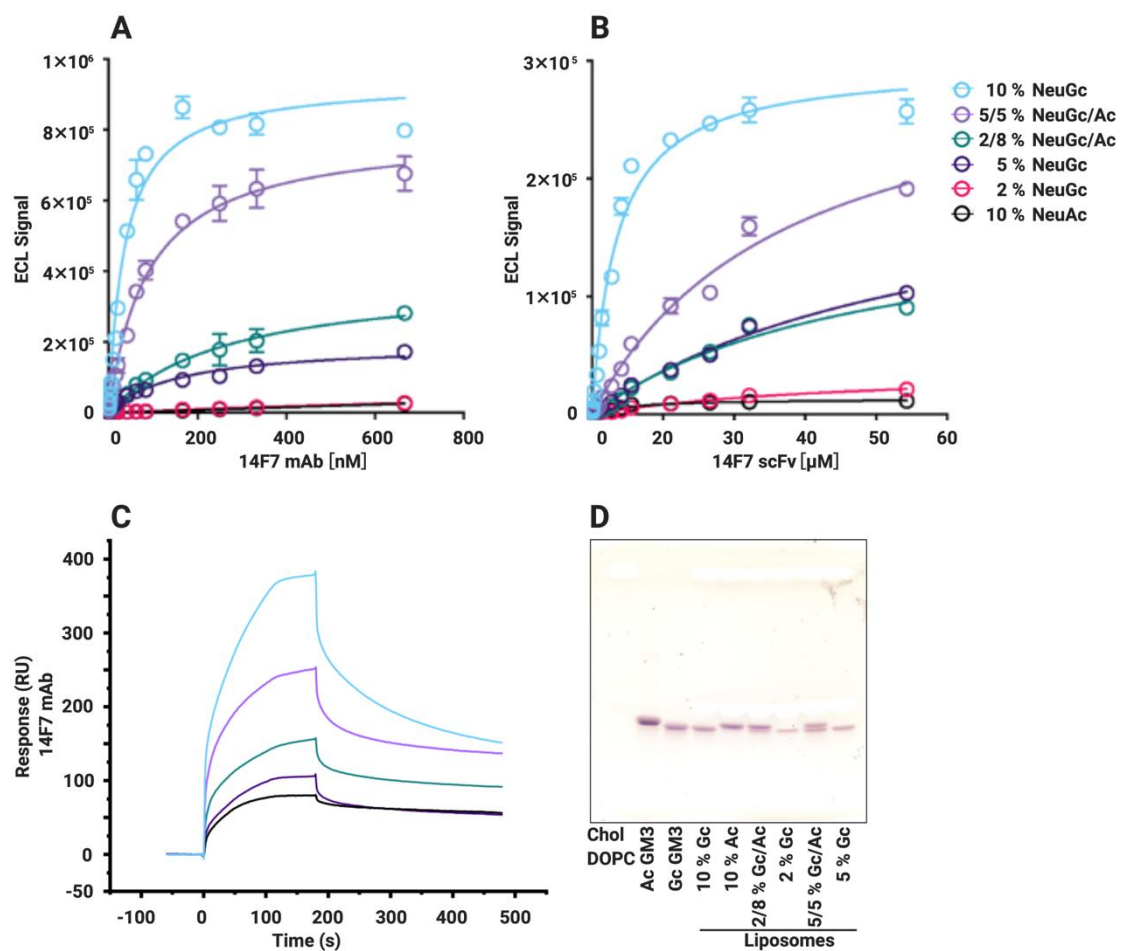

273

**Figure 5. Addition of NeuAc GM3 increases binding efficiency of 14F7 to NeuGc GM3.** Binding of (A) 14F7 mAb and (B) 14F7 scFv to MLVs composed of DOPC/Chol/GM3 measured by EIA. Representative plots of 3 independent measurements. C SPR spectroscopy of 14F7 mAb binding to an HPA chip with a monolayer of DOPC/Chol/GM3. The sensorgram represents one of two independent measurements (to save scarce sample), resulting in the same trend observed by EIA. D Thin layer chromatography of lipids extracted from the vesicles used in EIA assay. NeuAc and NeuGc GM3 were abbreviated Ac and Gc, respectively. The lipids were stained with orcinol.

## 274 **Discussion**

275 Gangliosides are sialic-acid containing glycosphingolipids present in the plasma  
276 membranes of all vertebrates. Together with cholesterol, sphingomyelin and specific  
277 membrane proteins, they are concentrated in membrane nanodomains often referred to  
278 as lipid rafts<sup>39-45</sup>. Gangliosides are functionally important and are known to modulate  
279 cellular signaling<sup>46-49</sup>. Despite decades of studies, the structure and function of these  
280 cell surface antigens remain to be fully appreciated, and only few anti-ganglioside  
281 antibodies have been raised<sup>50</sup>.

282

### 283 **14F7 specificity**

284 14F7 can distinguish the very small chemical difference between the gangliosides  
285 NeuGc and NeuAc GM3<sup>7,9</sup>, and even more remarkably, we have now discovered that it  
286 does so indirectly, through a water molecule. NeuGc GM3 engages in two water-  
287 mediated interactions with Trp33, one with its main chain and one with the  $\pi$ -system of  
288 the indole side chain (both through Wat1; Figure 2A). Such an interaction is weaker  
289 than an ordinary hydrogen bond<sup>51</sup>, however, the importance of this interaction is  
290 highlighted by the fact that substitution of Trp33 with Phe or Tyr maintains specificity,  
291 while non-aromatic residues abolish binding or allow cross-reactivity with NeuAc  
292 GM3<sup>18</sup>. H-bonds commonly mediate specificity in antibody-antigen recognition  
293 through direct contact between paratope and epitope side chains<sup>52</sup>. In the case of 14F7,  
294 Wat1 is already present in the protein apo-structure (PDB ID: 6FFJ<sup>9</sup>). A thorough  
295 analysis of water-tryptophan interactions indicates that the six-membered ring of the  
296 indole side chain favors  $\pi$ -OH interaction, while the five-membered pyrrole ring favors  
297  $\pi$ -lone pair interaction<sup>53</sup>. The latter appears to be the case for Wat1, thus positioning it  
298 as an H-bond donor for the *N*-glycolyl group of NeuGc GM3. While it is well known  
299 that the hydration shell is important for protein structure and function<sup>54,55</sup>, including the  
300 recognition of carbohydrates<sup>56-58</sup> and antibody-antigen interactions<sup>59-62</sup>, the complexity  
301 of antibody engineering is highlighted by our finding of this indirect, water-mediated  
302 specificity.

303

304

### 305 **Selectivity versus cross-reactivity**

306 NeuGc is bound to the bottom of a cleft formed by the variable heavy chain of 14F7  
307 (Figure 2A), which is separated from the variable light chain through the long CDR H3  
308 loop. The predicted NeuGc recognition site has previously been functionally mapped  
309 by a combinatorial phage display strategy using an alternative format of 14F7 scFv<sup>18</sup>.  
310 The study revealed that substitution of Trp33 in combination with residues 28, 30 or 31  
311 could yield cross-reactive 14F7 variants (*e.g.*, S28R/S30R/W33Q, S31R/W33Q and  
312 S28R/S31R, and to a lesser extent by single amino acid substitutions)<sup>18</sup>. Therefore  
313 cross-reactivity is likely mediated through direct interactions with the sialic acid  
314 residue, in particular by a salt-bridge to the negatively charged carboxylate group found  
315 in both NeuGc and NeuAc GM3. To further explore the mutagenesis data, we modeled  
316 the 14F7 S31R/W33Q variant in complex with NeuAc GM3 (Figure 2C). Substituting  
317 Trp33 as in 14F7 W33Q likely leads to the replacement of Wat1 by the glutamine side  
318 chain amide, which can interact directly with the *N*-glycolyl OH of NeuGc GM3  
319 (Figure 2B). This mutation alone decreased NeuGc GM3 binding, but promoted a weak  
320 interaction to the NeuAc variant of GM3<sup>18</sup>. Substitution of Ser31 with Arg (S31R)  
321 probably trades an H-bond to one of the NeuGc glycerol hydroxyls for a charge  
322 interaction of the guanidinium moiety with the sialic acid carboxyl group found in both  
323 NeuGc and NeuAc GM3 (Figure 2C), thus conferring some cross-reactivity to the  
324 antibody. Arginine substitutions of Ser28 (S28R) or Thr30 (T30R) likely elicit similar  
325 effects. Interestingly, in spite of this additional interaction, substituting Ser31 for Arg,  
326 either alone or combined with other amino acid substitutions, hardly increased the  
327 affinity for NeuGc GM3<sup>18</sup>.

328 Although it may seem counterintuitive that NeuAc could bind to a polar pocket, a polar  
329 environment is not unprecedented for NeuAc. For example, cross-reactive rotaviruses  
330 that recognize both NeuAc and NeuGc GM3 have been shown to display similar polar,  
331 water-containing pockets to accommodate the acetyl or glycolyl groups of their glycan  
332 receptors<sup>63</sup>. Favorable interactions elsewhere, *e.g.*, with the sialic acid carboxylate or  
333 glycerol chain, may well compensate for less favorable interactions of the *N*-acetyl  
334 group. In fact, it is likely that selectivity of NeuGc over NeuAc GM3 requires a fine  
335 balance of interactions, and that too tight binding of the sialic acid residue may prevent  
336 selectivity and would tip the balance towards cross-reactivity towards NeuGc and  
337 NeuAc GM3.



### 338 **Glycan conformation and antibody recognition**

339 In the crystal structure of the scFv–saccharide complex (PDB ID: 6S2I; this work), the  
340 saccharide adopts a synclinal conformation (Figure 1C), and the only interaction with  
341 14F7 is *via* the sialic acid (Figure 2A). However, the carbohydrate conformation may  
342 be forced by the crystal, into which the ligand was soaked. For example, we note that  
343 the anti-clinal conformation would lead to clashes with other protein molecules in the  
344 crystal, whereas the synclinal conformation is stabilized by an interaction of the sialic  
345 acid glycerol chain with V<sub>L</sub> residue Arg23 of a neighboring scFv in the crystal  
346 (Table 2). In a biological context (and in solution), the saccharide would be free to adopt  
347 both conformations (Figure 1D) – also the anti-clinal conformation, which provides a  
348 larger contact surface with the antibody (293 *versus* 218 Å<sup>2</sup>). Dynamic binding may in  
349 fact provide an entropic advantage. In both conformations, the glycosidic linkage  
350 between NeuGc and Gal places the key CDR H3 residue Arg98 in a central position for  
351 interaction with the NeuGc GM3 trisaccharide (Figure 2AB), explaining why any  
352 substitution of this residue renders it incompatible with binding. In anti-clinal  
353 conformation, Arg98 can additionally interact with the glucose moiety of NeuGc GM3  
354 through H-bonds. This is also true for Arg100 and Arg100<sub>A</sub>, which are located at the tip  
355 of CDR-H3. Moreover, the arginine residues exposed on CDR H3 create a strongly  
356 positively charged surface patch that will likely also interact with other components of  
357 the plasma membrane. The observation that these residues, in general, can be  
358 exchanged while maintaining a positive charge<sup>18</sup>, indicate non-specific interactions  
359 with the membrane through negative charges found in the proximity of the target  
360 antigen, such as other phospholipids, gangliosides or proteins.

361

### 362 **14F7–membrane interactions: “All-or-nothing” effect**

363 To better understand the mode of interaction between the 14F7 and NeuGc GM3 in the  
364 context of a membrane, we performed binding measurements using different  
365 membrane-mimetic systems. These studies confirmed the selectivity of 14F7. However,  
366 binding was only observed above a concentration threshold of the NeuGc GM3  
367 (Figure 3B). The observed “all-or-nothing” effect for glycolipid recognition is not a  
368 new concept in itself. For example, Nores *et al.* observed that the murine mAb M2590  
369 only recognized the GM3 antigen when the ganglioside concentration in a membrane

370 reached a threshold of 8 %, as determined by binding to liposomes<sup>64</sup>. That 14F7 mAb  
371 recognizes NeuGc GM3 in a similar manner is intriguing and suggests that at low  
372 concentrations, the antigen remains “cryptic”. For mAbs, avidity immediately springs  
373 to mind as logical explanation for such a threshold effect, *i.e.*, if recognition by both  
374 Fabs is required to detect and enhance binding. However, since the same effect is also  
375 observed for the 14F7 scFv, both related to density and curvature, this clearly indicates  
376 that avidity cannot be the main cause of the observed effect. Instead, it suggests that at  
377 low concentrations, the glycolipid conformation in the membrane does not allow  
378 recognition by the antibody (Figure 6A). At high concentrations, the gangliosides may  
379 pack differently, for example through carbohydrate stacking<sup>65</sup>, and expose their *N*-  
380 glycolyl group to enable recognition (Figure 6B). The surrounding sialic acid residues  
381 from other GM3 molecules close-by may further enhance affinity due to the increased  
382 negative charge. The fact that the addition of NeuAc GM3 to low concentrations of  
383 NeuGc GM3 enables and enhances 14F7 binding (Figure 5), supports this hypothesis.

384

### 385 **NeuGc GM3 clustering**

386 In contrast to the receptor-binding B-pentamer of the cholera toxin (CTB), which is  
387 commonly used to label GM1 molecules and can lead to ganglioside clustering<sup>66</sup>, 14F7  
388 appears to bind only to pre-existing NeuGc GM3 assemblies and not drive the  
389 formation of such. This conclusion is based on the observation that (i) the monovalent  
390 scFv fragment showed similar binding characteristics as the mAb, and (ii) we never  
391 observed any domain formation in GUVs, even after overnight incubation with the  
392 divalent 14F7 mAb. For CTB, domain formation was observed when the protein was  
393 incubated with GUVs containing substantially lower amounts of its main glycolipid  
394 receptor, GM1<sup>66</sup>.

395

### 396 **Curvature effect**

397 The collective behavior of lipids and physicochemical membrane properties can be  
398 directly modulated by temperature, pressure and molecular stress<sup>67,68</sup>. Another  
399 important parameter is membrane curvature<sup>49,69-71</sup>. Unexpectedly, we observed that the  
400 anti-tumor antibody 14F7 preferentially recognizes NeuGc GM3 present in GUVs or  
401 MLVs, but not in 100 nm LUVs. We hypothesize that high positive curvature might

402 disrupt carbohydrate stacking interactions critical for exposure of the NeuGc *N*-glycolyl  
403 group, preventing NeuGc GM3 recognition as illustrated in Figure 6C.

404

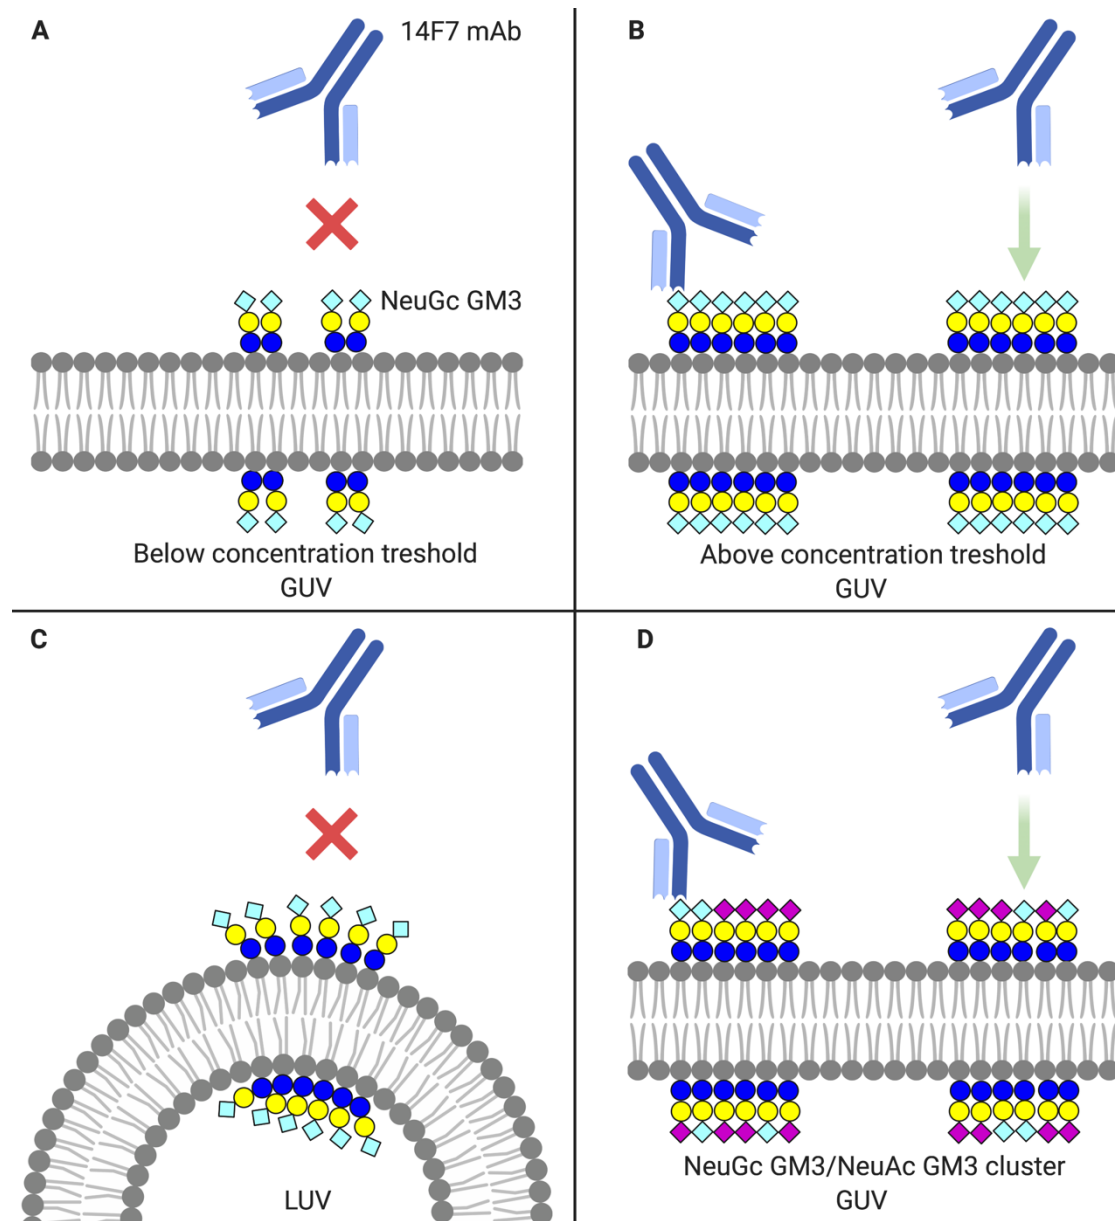

405

**Figure 6. Model of NeuGc GM3 recognition by 14F7.** **A** 14F7 binding is not observed at low NeuGc GM3 concentrations. **B** Above a ganglioside concentration threshold, 14F7 attaches to NeuGc GM3-containing glycolipid clusters on low-curvature membrane surfaces (GUV). **C** 14F7 does not bind to NeuGc GM3 in highly curved LUVs. **D** The addition of NeuAc GM3 to NeuGc GM3-containing liposomes enables 14F7 binding even at low NeuGc GM3 concentrations, possibly through the formation of functional glycolipid clusters. Carbohydrate symbols follow the nomenclature of the Consortium for Functional Glycomics: *N*-acetyl neuraminic acid – purple diamond; *N*-glycolyl neuraminic acid – light blue diamond; galactose – yellow circle; glucose – blue circle. Prepared with BioRender.

406

407 Many lipids have a cone shape rather than a cylindrical shape<sup>72</sup>. In a flat lipid bilayer,  
408 the packing of cone-shaped lipids leads to packing tension (line-tension) that can be  
409 relieved by the spontaneous formation of higher-order submicron clusters<sup>69,70</sup>. This  
410 could be the driving force for NeuGc GM3 clustering, where ganglioside and  
411 cholesterol form liquid-ordered structures surrounded by liquid-disordered regions<sup>73,74</sup>.  
412 It would be interesting to test if also negatively curved interfaces (*e.g.*, caveola and  
413 endocytic pits) elicit the preferable conformation for 14F7 recognition.

414

#### 415 **New applications for 14F7?**

416 In biological membranes, gangliosides are found in conjunction with cholesterol,  
417 sphingomyelin and specific membrane proteins. Cholesterol is well known to modulate  
418 glycolipid conformation and enable receptor binding<sup>42,75-79</sup>. Here, we show that also the  
419 interaction between different gangliosides (*i.e.*, NeuAc and NeuGc GM3, Figure 6D)  
420 can influence the conformation of glycolipids in the membrane – and make the  
421 gangliosides amenable to recognition by 14F7. This is valuable information, for two  
422 reasons: For one, it allows the detection of NeuGc GM3 even at low concentrations.  
423 This is the case in human cells (and although NeuGc GM3 content appears to increase  
424 in certain cancers, it is unclear if high concentrations can be reached). In contrast, the  
425 non-binding NeuAc GM3 is naturally expressed in all cells and may thus potentiate the  
426 recognition of low concentrations of NeuGc GM3 in cellular membranes, exposing the  
427 antigen for specific targeting. So far, we have only studied 14F7's capacity to recognize  
428 NeuGc GM3 clusters in a membrane mimetic system, however, it is reasonable to  
429 assume that a similar effect occurs in a cellular environment. Although further  
430 investigation is certainly required, this would open up for completely new applications  
431 of 14F7, in the clinical setting as well as for biochemical analysis.

432

#### 433 **Conclusions**

434 We set out to characterize the exquisite specificity of 14F7 for NeuGc GM3, and its  
435 selectivity over NeuAc GM3, and have now solved the crystal structure of this  
436 promising anti-tumor antibody in complex with its target antigen by high-resolution X-  
437 ray crystallography. Complementary qualitative and quantitative liposome interaction

438 studies with NeuGc GM3 additionally yielded unique insights into the formation and  
439 characteristics of glycolipid clusters and, potentially, membrane nanodomains.

440 Generally, antigen and immunogen are thought to have identical structures. Our data  
441 suggest that NeuGc GM3 concentration in the membrane influences its presentation  
442 and, in consequence, strongly affects recognition by 14F7. Therefore, although the  
443 immunogen is NeuGc GM3, the actual antigen recognized by 14F7 antibody is "high  
444 density NeuGc GM3". Similar results were previously described for the M2590 mAb  
445 for NeuAc GM3<sup>64</sup>. Here we show additionally that different gangliosides can  
446 conformationally modulate each other, *i.e.*, the presence of NeuAc GM3 helps convert  
447 NeuGc GM3 to its antigenic form. The switch between conformations appears to be  
448 abrupt, as caused by a phase transition, at sufficiently high concentration. However,  
449 binding requires that the membrane surface is relatively flat, as in GUVs and MLVs,  
450 and probably in biological membranes. We suspect that high positive curvature may  
451 disrupt the alignment of the saccharide head groups, abrogating binding of 14F7  
452 (Figure 6). It may also dilute the concentration of negative charges, affecting  
453 electrostatic membrane-antibody interactions.

454 Our findings further suggest that under favorable conditions, such as the presence of  
455 interacting molecules like NeuAc GM3, NeuGc GM3 can be recognized even at  
456 relatively low concentrations in cellular membranes, despite requirement of a "high-  
457 density-form". Our data thus inform new concepts for designing new immunotherapy  
458 strategies targeting glycolipids.

459

## 460 **Methods**

### 461 **Synthesis of NeuGc trisaccharide**

462 The NeuGc GM3 trisaccharide was synthesized through an IBr/AgOTf-promoted  
463 glycosylation of a benzylated lactose acceptor with a NeuGc thioglycoside donor,  
464 followed by global deprotection of the obtained trisaccharide as reported earlier<sup>9</sup>.

465

### 466 **Expression and purification of 14F7 derived scFv**

467 The 14F7 scFv was produced by a variation of a protocol described by Bjerregaard-  
468 Andersen *et al.*<sup>9</sup>. Compared to the original 14F7 mAb, this construct contains an  
469 alternative light chain identified by Rojas *et al.*<sup>8</sup>. The linker was chosen on the basis of  
470 a vector system established for expression of single chain T-cell receptors (TCRs) and  
471 single-chain variable fragments (scFvs) in *Escherichia coli*<sup>80,81</sup>. Briefly, the scFv was  
472 expressed in *E. coli* by a pFKPEN vector-based system. The vector encodes a pelB  
473 leader sequence, thus promoting the translocation of the protein to the periplasm.  
474 Purification included limited lysis of the *E. coli* outer membrane to release the mature  
475 scFv, and subsequent purification by protein L affinity chromatography and size  
476 exclusion chromatography to reach a highly pure and homogenous preparation for  
477 crystallization and binding experiments.

478

### 479 **Crystallization of the 14F7 scFv in complex with NeuGc trisaccharide**

480 Crystallization of the 14F7 scFv was performed as described earlier<sup>9</sup>. Crystals of good  
481 diffraction quality were obtained from the Morpheus screen (Hampton Research, US)  
482 after seeding with small crystals from initial hits. Remaining crystals from the D12  
483 condition (12.5 % w/v PEG 1000, 12.5 % w/v PEG 3350, 12.5 % v/v MPD, 0.02 M  
484 1,6-hexandiol, 0.02 M 1-butanol, 0.02 M(RS)-1,2-propanediol, 0.02 M 2-propanol,  
485 0.02 M 1,4-butanediol, 0.02 M 1,3-propanediol, 0.1 M Bicine/Tris base pH 8.5), used  
486 for determination of the 14F7 scFv apo-structure<sup>9</sup>, were soaked by the addition of the  
487 synthesized NeuGc trisaccharide in powder form. The crystals were incubated for 1h  
488 before flash-cooling in liquid nitrogen and stored for diffraction experiments.

489

## 490 **Data collection and structure determination**

491 Diffraction data extending to 2.3 Å were collected at the ID30A-3 beam line at the  
492 European Synchrotron Radiation Facility (ESRF), Grenoble, France. X-ray data were  
493 auto-processed at the ESRF by the EDNA pipeline<sup>82</sup>. The structure was phased by  
494 molecular replacement with the PHENIX crystallographic software package<sup>83</sup>, using  
495 the 14F7 scFv apo-structure (PDB ID: 6FFJ<sup>9</sup>) as search model, and refined in alternating  
496 cycles of manual model building and refinement with PHENIX<sup>83</sup> and COOT<sup>84</sup>. Water  
497 molecules were built in at late stages of the refinement, initially using the automated  
498 finding by PHENIX. These sites were then inspected individually and assessed for  
499 removal in case of electron density sigma level  $>1.10 \text{ e}/\text{Å}^3$  or bond distances  $>3.5 \text{ Å}$  or  
500  $<2.2 \text{ Å}$ . Likewise, missing water molecules were added manually. The phased map  
501 revealed additional electron density in one of the four scFv molecules in the asymmetric  
502 unit, which was modelled as NeuGc GM3 trisaccharide. The trisaccharide ligand was  
503 built using eLBOW<sup>85</sup> and modeled into the electron density of the binding pocket at  
504 final stages of structure building and adjusting occupancy by matching ligand *B*-factors  
505 to interacting protein residues. An OMIT difference density map was made by  
506 removing the trisaccharide ligand from the final model, followed by five refinement  
507 cycles using PHENIX<sup>83</sup>. The final model was deposited in the Protein Data Bank with  
508 accession code 6S2I.

509

## 510 **Modeling**

511 The program VMD<sup>86</sup> was used to for visualization and analysis, as well as for molecular  
512 modeling. The two amino acid substitutions in the heavy variable domain – S31R and  
513 W33Q – were made using the Mutator plugin implemented in VMD. Side chain  
514 conformations were modeled using the Molefactory plugin. This same tool was used to  
515 model the anticlinal conformation of the GM3 trisaccharide, keeping the sialic acid in  
516 its crystal position and modifying only the two torsion angles of its glycosidic linkage  
517 with galactose.

518

## 519 **Preparation of giant unilamellar vesicles (GUVs)**

520 1,2-dioleoyl-*sn*-glycero-3-phosphocholine (DOPC) and cholesterol (both from Avanti,  
521 US) stocks were dissolved in chloroform/methanol (10:1), *N*-Acetyl (Matreya, US)

522 and/or *N*-glycolyl GM3 (isolated from horse erythrocytes<sup>87</sup> and kindly provided by  
523 CIM, Havana, Cuba) were dissolved in chloroform/methanol/water (2:1:0.1). GUVs  
524 were prepared by the polyvinyl alcohol (PVA; Mw 146,000-186,000, Sigma Aldrich,  
525 Germany) assisted method in the absence of divalent ions. Black, 96-well glass bottom  
526 plates (Greiner Bio-One) were coated with 2 % PVA and evaporated by heating at  
527 70 °C for 20 min. In total 10 µl of desired lipid mixtures at 1 mg/mL in  
528 chloroform/methanol/water 1/2/0.8 (v/v) was spread on top of the PVA coated wells,  
529 followed by subsequent incubation under vacuum for at least 1 h to form a lipid film  
530 and allow removal of organic solvents. Sucrose containing swelling buffer (280 mM  
531 sucrose, 25 mM HEPES-NaOH, pH 7.4; 300 µl per well) was added and incubated for  
532 at least 20 min to induce vesicle formation.

533

### 534 **Confocal imaging**

535 GUVs were deposited in a 1 % BSA precoated imaging chamber (384-Well Glass-  
536 Bottom Plates, Greiner Bio-One, Austria). Labeled 14F7 mAb (14F7hT) was added and  
537 the sample was left for 30 min incubation at 23 °C before confocal imaging. GUVs  
538 were imaged with a Zeiss LSM 780 confocal microscope. 488 nm and 543 nm lasers  
539 were used for excitation of green and red fluorophores, respectively. BP 530-550, BP  
540 585-615 filters in multi-track mode were used to eliminate the cross talk.

541

### 542 **Preparation of liposomes**

543 For vesicle preparation, lipids (DOPC and cholesterol from Avanti, US, NeuAc GM3  
544 from Matreya, US, and NeuGc GM3 from CIM, Havana, Cuba) were mixed at the  
545 desired molar ratios and dried under nitrogen gas stream, followed by incubation under  
546 vacuum for 4 h to remove organic solvents. The dried lipid film was re-hydrated in  
547 HEPES-buffered saline (HBS) (10 mM HEPES -NaOH, 150 mM NaCl, pH 7.4) to a  
548 final concentration of 1 mg/mL, for 15 min at 600 rpm. Multilamellar vesicles (MLV)  
549 were either used directly or further processed to yield unilamellar vesicles (LUVs).  
550 LUVs were produced by subjecting the liposomes to 10 cycles of freezing in liquid  
551 nitrogen and subsequent thawing in a heating block at 30 °C. The vesicle solution was  
552 extruded 21 times through a 100 nm diameter polycarbonate membrane (Whatman®  
553 Nuclepore, Fisher Scientific, US) using an extrusion kit (Avanti, US). The size of the



554 liposomes was determined by dynamic light scattering using a Zetasizer Nano ZS  
555 (Malvern Instruments, UK).

556

### 557 **Lipid extraction and validation by thin-layer chromatography (TLC)**

558 Lipid composition of liposomes was assayed by thin layer chromatography as described  
559 previously<sup>88</sup>. Briefly, lipids were extracted using two step extraction protocol  
560 (chloroform:methanol 10:1 followed by 2:1)<sup>88</sup>. After each step, the lipid containing  
561 organic phase was pooled and dried under a nitrogen stream. The lipids were  
562 resuspended in a small volume of chloroform/methanol (2:1) and applied to a to HPTLC  
563 plate (Silica Gel 60, Merck, Germany) together with DOPC/cholesterol and  
564 NeuGc/NeuAc GM3 as standards. The plate was placed under vacuum for 30 min. For  
565 development, chloroform/methanol/ 0.2 % calcium chloride (60/35/6) was used. To  
566 visualize glycolipids, the plate was sprayed with orcinol (Sigma Aldrich, Germany) and  
567 heated (200 °C until desired signal was observed).

568

### 569 **Flotation assay**

570 50 µl of liposomes was mixed with 14F7 mAb (14F7hT) or scFv (20 µg/mL final  
571 concentration) and incubated for 30 min on ice. Thereafter, iodixanol (Optiprep; Sigma  
572 Aldrich, Germany) was added to a final concentration of 30 % and a step gradient was  
573 built on top (10 %, 2.5 %, and 0 % iodixanol in HBS). Protein-liposome complexes  
574 were separated from unbound protein by centrifugation (2 h at 45.000 rpm, 4 °C,  
575 MLS50 rotor -Beckman Coulter) in the density gradient. After flotation, 11 fractions  
576 were collected from top of the tube. Samples were precipitated with 10 % TCA and  
577 pelleted by centrifugation (20 min, 20,000 x g, 4 °C). The supernatant was discarded,  
578 and the remaining pellet was neutralized with 1.5 M Tris -HCl, pH 8.8. SDS loading  
579 buffer (250 mM Tris-HCl pH 6.8, 12.5 mM EDTA, 10 % SDS, 25 % glycerol, 200 mM  
580 DTT) was added to all samples before loading on a 4-12 % Bis-Tris gel for SDS-  
581 electrophoresis.

582

583

584

## 585 **Electrochemiluminescence immunoassay (EIA)**

586 Liposomes were passively adsorbed on the electrode surface (1 h, 23 °C), and the  
587 residual sites on the surface were blocked with 0.2 % porcine gelatin (1 h, 23 °C). The  
588 surface was then washed three times with HBS and porcine gelatin solutions containing  
589 the desired concentrations of 14F7 mAb or scFv (were added to each well). Binding  
590 was carried out for 2 h at 23 °C. Wells were then washed and a solution of goat anti-  
591 human-SulfoTAG (Mesoscale Discovery, US) or protein L-SulfoTAG was added  
592 (1 µg/mL, 23 °C, 1 h). The wells were washed and reading buffer was added (MSD  
593 surfactant-free reading buffer). The background was determined from binding of  
594 secondary antibodies or protein L to liposomes. Data were acquired on a SECTOR  
595 Imager 6000. The recorded data were analyzed using GraphPad Prism 6.0 software  
596 using one site-specific binding algorithm.

597

## 598 **Labeling of humanized 14F7 mAb (14F7hT) and protein L**

599 14F7hT was labeled using the DyLight 488-NHS ester (Thermo Fisher, US) for  
600 detection during confocal microscopy. Protein L was labeled with SulfoTAG-NHS  
601 ester (Mesoscale Discovery, US) at a 1:20 molar ratio for scFv detection during EIA.  
602 The mixture was incubated for 1 h at 4 °C. The reaction was stopped by the addition of  
603 at least 5-fold molar excess of ethanolamine over the NHS-reagent, followed by the  
604 removal of excess label-molecules by a gravity spin column (GE Healthcare, Germany).

605

## 606 **Thermal stability measurements using nanoDSF**

607 For nanoDSF measurements, scFv was diluted with HBS to reach a final concentration  
608 of 0.5 mg/mL, and subsequently filled into nanoDSF standard treated capillaries.  
609 Thermal unfolding and aggregation was monitored in a temperature ramp with 1 °C/min  
610 from 20 °C to 95 °C with a resolution of ~ 20 data points/min. Analysis of unfolding  
611 and aggregation was performed using the PR.Control Software.

612

## 613 **Surface Plasmon Resonance**

614 SPR experiments were performed using a BIAcore X100 instrument on an HPA sensor  
615 chip<sup>89</sup> (GE Healthcare, Germany). An HPA chip was cleaned with 40 mM octyl-

616 glucoside (10  $\mu$ L/min, 5 min). Next, LUVs consisting of DOPC, cholesterol (both from  
617 Avanti, US), NeuGc GM3 (CIM, Havana, Cuba) and/or NeuAc GM3 (Matreya, US) at  
618 the desired molar ratios, were injected across the sensor chip at a low flow rate. The  
619 LUVs (400  $\mu$ M) were allowed to collapse and form a monolayer on the HPA chip  
620 (2  $\mu$ L/min, 15 min). Then, the chip was washed twice with 10 M NaOH (10  $\mu$ L/min,  
621 30 s), and once with HBS (10 mM HEPES, 150 mM NaCl, pH 7.4) (80  $\mu$ L/min, 60 s) to  
622 remove any unbound liposomes. The end-response was between 900 and 1300 RU.  
623 14F7 mAb (500 nM) in HBS was injected at 30  $\mu$ L/min for 3 min. The dissociation  
624 phase was measured for 5 min. At the end of the binding assay, the surface of the sensor  
625 chip was regenerated with two injections of 3:2 10 M NaOH/isopropanol (10  $\mu$ L/min,  
626 30 s). The binding response of the 14F7 mAb was obtained after subtracting the binding  
627 signal from the reference flow cell containing vesicles without gangliosides. The  
628 experiment was repeated twice with similar results.

629

### 630 **Western blot**

631 Proteins were transferred to a 0.45  $\mu$ m membranes (Millipore) for immunoblotting. The  
632 membrane was incubated for 1 h on a tilting tray (10 rpm, 23  $^{\circ}$ C) in TM-PBS buffer  
633 (0.1 % Tween 20, 5 % nonfat dry milk powder in 1x PBS), before a 20 sec wash in  
634 fresh TM-PBS. Secondary antibody (Goat anti-human IgG, 1.25  $\mu$ g/mL, SulfoTAG)  
635 diluted in TM-PBS was added, and the membrane was incubated for 1 h (10 rpm,  
636 23  $^{\circ}$ C). The membrane was washed thrice in 5 min intervals, twice in T-PBS (0.1 %  
637 Tween 20 in 1x PBS) and once in 1x PBS. Detection was performed with a CCD imager  
638 (Imager 600, GE Healthcare) using SuperSignal West Pico PLUS (Thermo Fisher, US)  
639 as substrate.

640

## 641 **Acknowledgements**

642 We thank the staff of ESRF (Guillaume Gotthard) for assistance and support in using  
643 beamline ID30A-3, and the Center of Molecular Immunology (CIM), Havana for  
644 providing us with 14F7 mAb and the NeuGc GM3 ganglioside. Work at UiO was  
645 funded by the University of Oslo (including the postdoc position of KBA and the PhD  
646 position of HJ). Work in Dresden was supported by the German Federal Ministry of  
647 Education and Research (BMBF) grant to the German Center for Diabetes Research  
648 (DZD e.V.; Ü.C.) and the Deutsche Forschungsgemeinschaft (DFG; Project Number  
649 251981924 – TRR 83; Ü.C.). Work at UdeM was supported with funds from the  
650 Colombian Government (NanoBioCáncer program, grant FP44842-211-2018), and  
651 work at UCD was funded by Science Foundation Ireland, grants No. 08/SRC/B1393  
652 and13/IA/1959. Work at NIC was supported by the Slovenian Research Agency  
653 (program grant P1-0391).

654

## 655 **Author contributions**

656 H.J., M.G., Ü.C. and U.K. conceived the study. F.A. synthesized the trisaccharide,  
657 supervised by S.O.. H.J. expressed and purified the constructs, supervised by U.K..  
658 K.B.-A. was in charge of the crystallography, with U.K. validating the crystal structure.  
659 E.M. performed the modeling studies. Liposome experiments were performed by H.J.,  
660 D.G. and M.G., who also served as supervisor for this part of the work. SPR  
661 experiments were performed by H.J. and A.S., supervised by G.A.. K.B.-A. and H.J.  
662 wrote the first draft of the manuscript, which was revised in tight collaboration with  
663 E.M., M.G. and U.K., and approved by all authors.

664

665

666

667

668

669

670

671

672

673

## 674 References

- 675 1 Dennis, J. W., Laferté, S., Waghorne, C., Breitman, M. L. & Kerbel, R. S.  $\beta$ 1-6  
676 branching of Asn-linked oligosaccharides is directly associated with metastasis.  
677 *Science* **236**, 582-585, doi:10.1126/science.2953071 (1987).
- 678 2 Hakomori, S. in *The molecular immunology of complex carbohydrates-2. Advances in*  
679 *experimental medicine and biology* Vol. 491 (ed Albert M. Wu) Ch. Tumor-  
680 associated carbohydrate antigens defining tumor malignancy: basis for development  
681 of anti-cancer vaccines, 369-402 (Springer, Boston, MA, 2001).
- 682 3 Pochechueva, T., Jacob, F., Fedier, A. & Heinzelmann-Schwarz, V. Tumor-  
683 associated glycans and their role in gynecological cancers: accelerating translational  
684 research by novel high-throughput approaches. *Metabolites* **2**, 913-939,  
685 doi:10.3390/metabo2040913 (2012).
- 686 4 Scott, A. M., Geleick, D., Rubira, M., Clarke, K., Nice, E. C., Smyth, F. E., Stockert,  
687 E., Richards, E. C., Carr, F. J., Harris, W. J., Armour, K. L., Rood, J., Kypridis, A.,  
688 Kronina, V., Murphy, R., Lee, F.-T., Liu, Z., Kitamura, K., Ritter, G., Laughton, K.,  
689 Hoffman, E., Burgess, A. W. & Old, L. J. Construction, production, and  
690 characterization of humanized anti-Lewis Y monoclonal antibody 3S193 for targeted  
691 immunotherapy of solid tumors. *Cancer Res* **60**, 3254-3261 (2000).
- 692 5 Yu, A. L., Gilman, A. L., Ozkaynak, M. F., London, W. B., Kreissman, S. G., Chen,  
693 H. X., Smith, M., Anderson, B., Villablanca, J. G., Matthay, K. K., Shimada, H.,  
694 Grupp, S. A., Seeger, R., Reynolds, C. P., Buxton, A., Reisfeld, R. A., Gillies, S. D.,  
695 Cohn, S. L., Maris, J. M. & Sondel, P. M. for the Children's Oncology Group. Anti-  
696 GD2 antibody with GM-CSF, interleukin-2, and isotretinoin for neuroblastoma. *N*  
697 *Engl J Med* **363**, 1324-1334, doi:10.1056/NEJMoa0911123 (2010).
- 698 6 Hutchins, L. F., Makhoul, I., Emanuel, P. D., Pennisi, A., Siegel, E. R., Jousheghany,  
699 F., Guo, X., Pashov, A. D., Monzavi-Karbassi, B. & Kieber-Emmons, T. Targeting  
700 tumor-associated carbohydrate antigens: a phase I study of a carbohydrate mimetic-  
701 peptide vaccine in stage IV breast cancer subjects. *Oncotarget* **8**, 99161-99178,  
702 doi:10.18632/oncotarget.21959 (2017).
- 703 7 Carr, A., Mullet, A., Mazorra, Z., Vázquez, A. M., Alfonso, M., Mesa, C., Rengifo,  
704 E., Pérez, R. & Fernández, L. E. A mouse IgG1 monoclonal antibody specific for N-  
705 glycolyl GM3 ganglioside recognized breast and melanoma tumors. *Hybridoma* **19**,  
706 241-247, doi:10.1089/02724570050109639 (2000).
- 707 8 Rojas, G., Talavera, A., Munoz, Y., Rengifo, E., Krenzel, U., Ångström, J.,  
708 Gavilondo, J. & Moreno, E. Light-chain shuffling results in successful phage display  
709 selection of functional prokaryotic-expressed antibody fragments to N-glycolyl GM3  
710 ganglioside. *J Immunol Methods* **293**, 71-83, doi:10.1016/j.jim.2004.07.002 (2004).
- 711 9 Bjerregaard-Andersen, K., Johannesen, H., Abdel-Rahman, N., Heggelund, J. E.,  
712 Hoås, H. M., Abraha, F., Bousquet, P. A., Høydahl, L. S., Burschowsky, D., Rojas,  
713 G., Oscarson, S., Løset, G. Å. & Krenzel, U. Crystal structure of an L chain  
714 optimised 14F7 anti-ganglioside Fv suggests a unique tumour-specificity through an  
715 unusual H-chain CDR3 architecture. *Sci Rep* **8**, 1-11, doi:10.1038/s41598-018-28918-  
716 5 (2018).
- 717 10 Torbidoni, A. V., Scursoni, A., Camarero, S., Segatori, V., Gabri, M., Alonso, D.,  
718 Chantada, G. & de Dávila, M. T. G. Immunoreactivity of the 14F7 Mab raised against  
719 N-glycolyl GM3 ganglioside in retinoblastoma tumours. *Acta Ophthalmol* **93**, e294-  
720 e300, doi:10.1111/aos.12578 (2015).
- 721 11 Blanco, R., Rengifo, C. E., Cedeño, M., Frómata, M., Rengifo, E. & Carr, A.  
722 Immunoreactivity of the 14F7 Mab (raised against N-glycolyl GM3 ganglioside) as a

- 723 positive prognostic factor in non-small-cell lung cancer. *Patholog Res Int* **2012**, 1-12,  
724 doi:10.1155/2012/235418 (2012).
- 725 12 Lahera, T., Calvo, A., Torres, G., E Rengifo, C., Quintero, S., Arango, M. d. C.,  
726 Danta, D., Vázquez, J. M., Escobar, X. & Carr, A. Prognostic role of 14F7 Mab  
727 immunoreactivity against N-glycolyl GM3 ganglioside in colon cancer. *J Oncol* **2014**,  
728 1-8, doi:10.1155/2014/482301 (2014).
- 729 13 Oliva, J. P., Valdés, Z., Casacó, A., Pimentel, G., González, J., Álvarez, I., Osorio,  
730 M., Velazco, M., Figueroa, M., Ortiz, R., Escobar, X., Orozco, M., Cruz, J., Franco,  
731 S., Díaz, M., Roque, L., Carr, A., Vázquez, A. M., Mateos, C., Rubio, M. C., Pérez,  
732 R. & Fernández, L. E. Clinical evidences of GM3 (NeuGc) ganglioside expression in  
733 human breast cancer using the 14F7 monoclonal antibody labelled with <sup>99m</sup>Tc. *Breast*  
734 *Cancer Res and Treat* **96**, 115-121, doi:10.1007/s10549-005-9064-0 (2006).
- 735 14 Fernández-Marrero, Y., Roque-Navarro, L., Hernández, T., Dorvignit, D., Molina-  
736 Pérez, M., González, A., Sosa, K., López-Requena, A., Pérez, R. & Mateo de Acosta,  
737 C. A cytotoxic humanized anti-ganglioside antibody produced in a murine cell line  
738 defective of N-glycolylated-glycoconjugates. *Immunobiology* **216**, 1239-1247,  
739 doi:10.1016/j.imbio.2011.07.004 (2011).
- 740 15 Dorvignit, D., Boligan, K. F., Relova-Hernández, E., Clavell, M., López, A., Labrada,  
741 M., Simon, H.-U., López-Requena, A., Mesa, C. & von Gunten, S. Antitumor effects  
742 of the GM3(Neu5Gc) ganglioside-specific humanized antibody 14F7hT against  
743 *Cmah*-transfected cancer cells. *Sci Rep* **9**, 1-12, doi:10.1038/s41598-019-46148-1  
744 (2019).
- 745 16 Carr, A., Mesa, C., Arango, M. d. C., Vázquez, A. M. & Fernández, L. E. *In vivo* and  
746 *in vitro* anti-tumor effect of 14F7 monoclonal antibody. *Hybrid Hybridomics* **21**, 463-  
747 468, doi:10.1089/153685902321043990 (2002).
- 748 17 Roque-Navarro, L., Chakrabandhu, K., de León, J., Rodríguez, S., Toledo, C., Carr,  
749 A., de Acosta, C. M., Hueber, A.-O. & Pérez, R. Anti-ganglioside antibody-induced  
750 tumor cell death by loss of membrane integrity. *Mol Cancer Ther* **7**, 2033-2041,  
751 doi:10.1158/1535-7163.MCT-08-0222. (2008).
- 752 18 Rojas, G., Pupo, A., Gómez, S., Krenzel, U. & Moreno, E. Engineering the binding  
753 site of an antibody against N-glycolyl GM3: from functional mapping to novel anti-  
754 ganglioside specificities. *ACS Chem Biol* **8**, 376-386, doi:10.1021/cb3003754 (2013).
- 755 19 Krenzel, U., Olsson, L.-L., Martínez, C., Talavera, A., Rojas, G., Mier, E., Ångström,  
756 J. & Moreno, E. Structure and molecular interactions of a unique antitumor antibody  
757 specific for N-glycolyl GM3. *J Biol Chem* **279**, 5597-5603,  
758 doi:10.1074/jbc.M311693200 (2004).
- 759 20 Labrada, M., Dorvignit, D., Hevia, G., Rodríguez-Zhurbenko, N., Hernández, A. M.,  
760 Vázquez, A. M. & Fernández, L. E. GM3(Neu5Gc) ganglioside: an evolution fixed  
761 neoantigen for cancer immunotherapy. *Semin Oncol* **45**, 41-51,  
762 doi:10.1053/j.seminoncol.2018.04.003 (2018).
- 763 21 Chou, H.-H., Takematsu, H., Diaz, S., Iber, J., Nickerson, E., Wright, K. L.,  
764 Muchmore, E. A., Nelson, D. L., Warren, S. T. & Varki, A. A mutation in human  
765 CMP-sialic acid hydroxylase occurred after the *Homo-Pan* divergence. *Proc Natl*  
766 *Acad Sci U S A* **95**, 11751-11756, doi:10.1073/pnas.95.20.11751 (1998).
- 767 22 Irie, A., Koyama, S., Kozutsumi, Y., Kawasaki, T. & Suzuki, A. The molecular basis  
768 for the absence of N-glycolylneuraminic acid in humans. *J Biol Chem* **273**, 15866-  
769 15871, doi:10.1074/jbc.273.25.15866 (1998).
- 770 23 Varki, A. N-glycolylneuraminic acid deficiency in humans. *Biochimie* **83**, 615-622,  
771 doi:10.1016/S0300-9084(01)01309-8 (2001).

- 772 24 Tangvoranuntakul, P., Gagneux, P., Diaz, S., Bardor, M., Varki, N., Varki, A. &  
773 Muchmore, E. Human uptake and incorporation of an immunogenic nonhuman  
774 dietary sialic acid. *Proc Natl Acad Sci U S A* **100**, 12045-12050,  
775 doi:10.1073/pnas.2131556100 (2003).
- 776 25 Bardor, M., Nguyen, D. H., Diaz, S. & Varki, A. Mechanism of uptake and  
777 incorporation of the non-human sialic acid *N*-glycolylneuraminic acid into human  
778 cells. *J Biol Chem* **280**, 4228-4237, doi:10.1074/jbc.M412040200 (2005).
- 779 26 Byres, E., Paton, A. W., Paton, J. C., Löfling, J. C., Smith, D. F., Wilce, M. C.,  
780 Talbot, U. M., Chong, D. C., Yu, H., Huang, S., Chen, X., Varki, N. M., Varki, A.,  
781 Rossjohn, J. & Beddoe, T. Incorporation of a non-human glycan mediates human  
782 susceptibility to a bacterial toxin. *Nature* **456**, 648-652, doi:10.1038/nature07428  
783 (2008).
- 784 27 Banda, K., Gregg, C. J., Chow, R., Varki, N. M. & Varki, A. Metabolism of  
785 vertebrate amino sugars with *N*-glycolyl groups: mechanisms underlying  
786 gastrointestinal incorporation of the non-human sialic acid xeno-autoantigen *N*-  
787 glycolylneuraminic acid. *J Biol Chem* **287**, 28852-28864,  
788 doi:10.1074/jbc.M112.364182 (2012).
- 789 28 Dhar, C., Sasmal, A. & Varki, A. From «serum sickness» to «xenosialitis»: past,  
790 present, and future significance of the non-human sialic acid Neu5Gc. *Front Immunol*  
791 **10**, 1-16, doi:10.3389/fimmu.2019.00807 (2019).
- 792 29 Bremer, E. G., Schlessinger, J. & Hakomori, S. Ganglioside-mediated modulation of  
793 cell growth. Specific effects of GM<sub>3</sub> on tyrosine phosphorylation of the epidermal  
794 growth factor receptor. *J Biol Chem* **261**, 2434-2440 (1986).
- 795 30 Hanai, N., Nores, G. A., MacLeod, C., Torres-Mendez, C.-R. & Hakomori, S.  
796 Ganglioside-mediated modulation of cell growth. Specific effects of GM<sub>3</sub> and lyso-  
797 GM<sub>3</sub> in tyrosine phosphorylation of the epidermal growth factor receptor. *J Biol*  
798 *Chem* **263**, 10915-10921 (1988).
- 799 31 Kabayama, K., Sato, T., Saito, K., Loberto, N., Prinetti, A., Sonnino, S., Kinjo, M.,  
800 Igarashi, Y. & Inokuchi, J. Dissociation of the insulin receptor and caveolin-1  
801 complex by ganglioside GM<sub>3</sub> in the state of insulin resistance. *Proc Natl Acad Sci U*  
802 *S A* **104**, 13678-13683, doi:10.1073/pnas.0703650104 (2007).
- 803 32 Kawashima, N., Yoon, S.-J., Itoh, K. & Nakayama, K.-i. Tyrosine kinase activity of  
804 epidermal growth factor receptor is regulated by GM<sub>3</sub> binding through carbohydrate  
805 to carbohydrate Interactions. *J Biol Chem* **284**, 6147-6155,  
806 doi:10.1074/jbc.M808171200 (2009).
- 807 33 Coskun, Ü., Grzybek, M., Drechsel, D. & Simons, K. Regulation of human EGF  
808 receptor by lipids. *Proc Natl Acad Sci U S A* **108**, 9044-9048,  
809 doi:10.1073/pnas.1105666108 (2011).
- 810 34 Malykh, Y. N., Schauer, R. & Shaw, L. *N*-glycolylneuraminic acid in human  
811 tumours. *Biochimie* **83**, 623-634, doi:10.1016/S0300-9084(01)01303-7 (2001).
- 812 35 Yin, J., Hashimoto, A., Izawa, M., Miyazaki, K., Chen, G.-Y., Takematsu, H.,  
813 Kozutsumi, Y., Suzuki, A., Furuhashi, K., Cheng, F.-L., Lin, C.-H., Sato, C., Kitajima,  
814 K. & Kannagi, R. Hypoxic culture induces expression of sialin, a sialic acid  
815 transporter, and cancer-associated gangliosides containing non-human sialic acid on  
816 human cancer cells. *Cancer Res* **66**, 2937-2945 (2006).
- 817 36 Alisson-Silva, F., Kawanishi, K. & Varki, A. Human risk of diseases associated with  
818 red meat intake: Analysis of current theories and proposed role for metabolic  
819 incorporation of a non-human sialic acid. *Mol Aspects Med* **51**, 16-30,  
820 doi:10.1016/j.mam.2016.07.002 (2016).

- 821 37 Bousquet, P. A., Sandvik, J. A., Jeppesen Edin, N. F. & Krengel, U. Hypothesis:  
822 hypoxia induces *de novo* synthesis of NeuGc gangliosides in humans through CMAH  
823 domain substitute. *Biochem Biophys Res Commun* **495**, 1562-1566,  
824 doi:10.1016/j.bbrc.2017.11.183 (2018).
- 825 38 Siebert, H.-C., Reuter, G., Schauer, R., von der Lieth, C.-W. & Dabrowski, J.  
826 Solution conformations of GM3 gangliosides containing different sialic acid residues  
827 as revealed by NOE-based distance mapping, molecular mechanics, and molecular  
828 dynamics calculations. *Biochemistry* **31**, 6962-6971, doi:10.1021/bi00145a014  
829 (1992).
- 830 39 Simons, K. & van Meer, G. Lipid sorting in epithelial cells. *Biochemistry* **27**, 6197-  
831 6202, doi:10.1021/bi00417a001 (1988).
- 832 40 Brown, D. A. & London, E. Structure and function of sphingolipid- and cholesterol-  
833 rich membrane rafts. *J Biol Chem* **275**, 17221-17224, doi:10.1074/jbc.R000005200  
834 (2000).
- 835 41 Pencer, J., Mills, T., Anghel, V., Krueger, S., Epand, R. M. & Katsaras, J. Detection  
836 of submicron-sized raft-like domains in membranes by small-angle neutron  
837 scattering. *Eur Phys J E Soft Matter* **18**, 447-458, doi:10.1140/epje/e2005-00046-5  
838 (2005).
- 839 42 Lingwood, D. & Simons, K. Lipid rafts as a membrane-organizing principle. *Science*  
840 **327**, 46-50, doi:10.1126/science.1174621 (2010).
- 841 43 Simons, K. & Sampaio, J. L. Membrane organization and lipid rafts. *Cold Spring*  
842 *Harb Perspect Biol* **3**, 1-17, doi:10.1101/cshperspect.a004697 (2011).
- 843 44 Nickels, J. D., Chatterjee, S., Stanley, C. B., Qian, S., Cheng, X., Myles, D. A. A.,  
844 Standaert, R. F., Elkins, J. G. & Katsaras, J. The in vivo structure of biological  
845 membranes and evidence for lipid domains. *PLoS Biol* **15**, 1-22,  
846 doi:10.1371/journal.pbio.2002214 (2017).
- 847 45 Semeraro, E. F., Devos, J. M., Porcar, L., Forsyth, V. T. & Narayanan, T. *In vivo*  
848 analysis of the *Escherichia coli* ultrastructure by small-angle scattering. *IUCrJ* **4**,  
849 751-757, doi:doi:10.1107/S2052252517013008 (2017).
- 850 46 Bremer, E. G., Hakomori, S., Bowen-Pope, D. F., Raines, E. & Ross, R. Ganglioside-  
851 mediated modulation of cell growth, growth factor binding, and receptor  
852 phosphorylation. *J Biol Chem* **259**, 6818-6825 (1984).
- 853 47 Hakomori, S. The glycosynapse. *Proc Natl Acad Sci U S A* **99**, 225-232,  
854 doi:10.1073/pnas.012540899 (2002).
- 855 48 Klock, T. I., Kavaliauskiene, S. & Sandvig, K. Cross-linking of glycosphingolipids at  
856 the plasma membrane: consequences for intracellular signaling and traffic. *Cell Mol*  
857 *Life Sci* **73**, 1301-1316, doi:10.1007/s00018-015-2049-1 (2016).
- 858 49 Cheng, X. & Smith, J. C. Biological membrane organization and cellular signaling.  
859 *Chem Rev* **119**, 5849-5880, doi:10.1021/acs.chemrev.8b00439 (2019).
- 860 50 Krengel, U. & Bousquet, P. A. Molecular recognition of gangliosides and their  
861 potential for cancer immunotherapies. *Front Immunol* **5**, 1-11,  
862 doi:10.3389/fimmu.2014.00325 (2014).
- 863 51 Gierszal, K. P., Davis, J. G., Hands, M. D., Wilcox, D. S., Slipchenko, L. V. & Ben-  
864 Amotz, D.  $\pi$ -hydrogen bonding in liquid water. *Phys Chem Lett* **2**, 2930-2933,  
865 doi:10.1021/jz201373e (2011).
- 866 52 Peng, H.-P., Lee, K. H., Jian, J.-W. & Yang, A.-S. Origins of specificity and affinity  
867 in antibody-protein interactions. *Proc Natl Acad Sci U S A* **111**, E2656-2665,  
868 doi:10.1073/pnas.1401131111 (2014).



- 869 53 Durec, M., Marek, R. & Kozelka, J. Water–tryptophan interactions: lone-pair··· $\pi$  or  
870 O–H··· $\pi$ ? Molecular dynamics simulations of  $\beta$ -galactosidase suggest that both modes  
871 can co-exist. *Chemistry* **24**, 5849-5859, doi:10.1002/chem.201705364 (2018).
- 872 54 Levy, Y. & Onuchic, J. N. Water mediation in protein folding and molecular  
873 recognition. *Annu Rev Biophys Biomol Struct* **35**, 389-415,  
874 doi:10.1146/annurev.biophys.35.040405.102134 (2006).
- 875 55 Bellissent-Funel, M.-C., Hassanali, A., Havenith, M., Henchman, R., Pohl, P.,  
876 Sterpone, F., van der Spoel, D., Xu, Y. & Garcia, A. E. Water determines the  
877 structure and dynamics of proteins. *Chem Rev* **116**, 7673-7697,  
878 doi:10.1021/acs.chemrev.5b00664 (2016).
- 879 56 Weis, W. I. & Drickamer, K. Structural basis of lectin-carbohydrate recognition.  
880 *Annu Rev Biochem* **65**, 441-473, doi:10.1146/annurev.bi.65.070196.002301 (1996).
- 881 57 Janin, J. Wet and dry interfaces: the role of solvent in protein–protein and protein–  
882 DNA recognition. *Structure* **7**, R277-279, doi:10.1016/s0969-2126(00)88333-1  
883 (1999).
- 884 58 Holmner, Å., Lebens, M., Teneberg, S., Ångström, J., Ökvist, M. & Krengel, U.  
885 Novel binding site identified in a hybrid between cholera toxin and heat-labile  
886 enterotoxin: 1.9 Å crystal structure reveals the details. *Structure* **12**, 1655-1667,  
887 doi:10.1016/j.str.2004.06.022 (2004).
- 888 59 Braden, B. C., Fields, B. A. & Poljak, R. J. Conservation of water molecules in an  
889 antibody–antigen interaction. *J Mol Recognit* **8**, 317-325, doi:10.1002/jmr.300080505  
890 (1995).
- 891 60 Cohen, G. H., Silvertown, E. W., Padlan, E. A., Dyda, F., Wibbenmeyer, J. A., Willson,  
892 R. C. & Davies, D. R. Water molecules in the antibody–antigen interface of the  
893 structure of the Fab HyHEL-5-lysozyme complex at 1.7 Å resolution: comparison  
894 with results from isothermal titration calorimetry. *Acta Crystallogr D Biol*  
895 *Crystallogr* **61**, 628-633, doi:10.1107/s0907444905007870 (2005).
- 896 61 Marino, S. F., Olal, D. & Daumke, O. A complex water network contributes to high–  
897 affinity binding in an antibody–antigen interface. *Data Brief* **6**, 394-397,  
898 doi:10.1016/j.dib.2015.12.023 (2015).
- 899 62 Horita, S., Nomura, Y., Sato, Y., Shimamura, T., Iwata, S. & Nomura, N. High-  
900 resolution crystal structure of the therapeutic antibody pembrolizumab bound to the  
901 human PD-1. *Sci Rep* **6**, 1-8, doi:10.1038/srep35297 (2016).
- 902 63 Yu, X., Coulson, B. S., Fleming, F. E., Dyason, J. C., von Itzstein, M. & Blanchard,  
903 H. Novel structural insights into rotavirus recognition of ganglioside glycan receptors.  
904 *J Mol Biol* **413**, 929-939, doi:10.1016/j.jmb.2011.09.005 (2011).
- 905 64 Nores, G. A., Dohi, T., Taniguchi, M. & Hakomori, S. Density-dependent recognition  
906 of cell surface GM3 by a certain anti-melanoma antibody, and GM3 lactone as a  
907 possible immunogen: requirements for tumor-associated antigen and immunogen. *J*  
908 *Immunol* **139**, 3171-3176 (1987).
- 909 65 Stewart, R. J. & Boggs, J. M. A carbohydrate–carbohydrate interaction between  
910 galactosylceramide-containing liposomes and cerebroside sulfate-containing  
911 liposomes: dependence on the glycolipid ceramide composition. *Biochemistry* **32**,  
912 10666-10674, doi:10.1021/bi00091a017 (1993).
- 913 66 Sezgin, E., Levental, I., Grzybek, M., Schwarzmann, G., Mueller, V., Honigmann, A.,  
914 Belov, V. N., Eggeling, C., Coskun, Ü., Simons, K. & Schwille, P. Partitioning,  
915 diffusion, and ligand binding of raft lipid analogs in model and cellular plasma

- 916 membranes. *Biochim Biophys Acta* **1818**, 1777-1784,  
917 doi:10.1016/j.bbamem.2012.03.007 (2012).
- 918 67 Bolmatov, D., Soloviov, D., Zhernenkov, M., Zav'yalov, D., Mamontov, E., Suvorov,  
919 A., Cai, Y. Q. & Katsaras, J. Molecular picture of the transient nature of lipid rafts.  
920 *Langmuir* **36**, 4887-4896, doi:10.1021/acs.langmuir.0c00125 (2020).
- 921 68 Collard, L., Perez-Guaita, D., Faraj, B. H. A., Wood, B. R., Wallis, R., Andrew, P. W.  
922 & Hudson, A. J. Light scattering by optically-trapped vesicles affords unprecedented  
923 temporal resolution of lipid-raft dynamics. *Sci Rep* **7**, 1-11, doi:10.1038/s41598-017-  
924 08980-1 (2017).
- 925 69 Kollmitzer, B., Heftberger, P., Rappolt, M. & Pabst, G. Monolayer spontaneous  
926 curvature of raft-forming membrane lipids. *Soft Matter* **9**, 10877-10884,  
927 doi:10.1039/c3sm51829a (2013).
- 928 70 Meinhardt, S., Vink, R. L. C. & Schmid, F. Monolayer curvature stabilizes nanoscale  
929 raft domains in mixed lipid bilayers. *Proc Natl Acad Sci U S A* **110**, 4476-4481,  
930 doi:10.1073/pnas.1221075110 (2013).
- 931 71 Sadeghi, S., Müller, M. & Vink, R. L. C. Raft formation in lipid bilayers coupled to  
932 curvature. *Biophys J* **107**, 1591-1600, doi:10.1016/j.bpj.2014.07.072 (2014).
- 933 72 Seddon, J. M. & Templer, R. H. in *Handbook of Biological Physics. Structure and*  
934 *dynamics of membranes: from cells to vesicles* Vol. 1 (eds R. Lipowsky & E.  
935 Sackmann) Ch. 3. Polymorphism of lipid water systems, 97-160 (Elsevier Science  
936 B.V., 1995).
- 937 73 Ipsen, J. H., Karlström, G., Mouritsen, O. G., Wennerström, H. & Zuckermann, M. J.  
938 Phase equilibria in the phosphatidylcholine-cholesterol system. *Biochim Biophys Acta*  
939 *Biomembr* **905**, 162-172, doi:10.1016/0005-2736(87)90020-4 (1987).
- 940 74 Ipsen, J. H., Mouritsen, O. G. & Zuckermann, M. J. Theory of thermal anomalies in  
941 the specific heat of lipid bilayers containing cholesterol. *Biophys J* **56**, 661-667,  
942 doi:10.1016/S0006-3495(89)82713-4 (1989).
- 943 75 Pascher, I. Molecular arrangements in sphingolipids. Conformation and hydrogen  
944 bonding of ceramide and their implication on membrane stability and permeability.  
945 *Biochim Biophys Acta Biomembr* **455**, 433-451, doi:10.1016/0005-2736(76)90316-3  
946 (1976).
- 947 76 Nyholm, P.-G., Pascher, I. & Sundell, S. The effect of hydrogen bonds on the  
948 conformation of glycosphingolipids. Methylated and unmethylated cerebroside  
949 studied by X-ray single crystal analysis and model calculations. *Chem Phys Lipids* **52**,  
950 1-10, doi:10.1016/0009-3084(90)90002-9 (1990).
- 951 77 DeMarco, M. L. & Woods, R. J. Atomic-resolution conformational analysis of the  
952 G<sub>M3</sub> ganglioside in a lipid bilayer and its implications for ganglioside-protein  
953 recognition at membrane surfaces. *Glycobiology* **19**, 344-355,  
954 doi:10.1093/glycob/cwn137 (2009).
- 955 78 Yahi, N., Aulas, A. & Fantini, J. How cholesterol constrains glycolipid conformation  
956 for optimal recognition of Alzheimer's  $\beta$  amyloid peptide (A $\beta$ <sub>1-40</sub>). *PloS One* **5**, 9079-  
957 9079, doi:10.1371/journal.pone.0009079 (2010).
- 958 79 Giri, R. P., Chakrabarti, A. & Mukhopadhyay, M. K. Cholesterol-induced structural  
959 changes in saturated phospholipid model membranes revealed through X-ray  
960 scattering technique. *J Phys Chem B* **121**, 4081-4090, doi:10.1021/acs.jpcc.6b12587  
961 (2017).
- 962 80 Løset, G. Å., Løbersli, I., Kavlie, A., Stacy, J. E., Borgen, T., Kausmally, L.,  
963 Hvattum, E., Simonsen, B., Hovda, M. B. & Brekke, O. H. Construction, evaluation

- 964 and refinement of a large human antibody phage library based on the IgD and IgM  
965 variable gene repertoire. *J Immunol Methods* **299**, 47-62,  
966 doi:10.1016/j.jim.2005.01.014 (2005).
- 967 81 Gunnarsen, K. S., Lunde, E., Kristiansen, P. E., Bogen, B., Sandlie, I. & Løset, G. Å.  
968 Periplasmic expression of soluble single chain T cell receptors is rescued by the  
969 chaperone FkpA. *BMC Biotechnol* **10**, 1-13, doi:10.1186/1472-6750-10-8 (2010).
- 970 82 Incardona, M.-F., Bourenkov, G. P., Levik, K., Pieritz, R. A., Popov, A. N. &  
971 Svensson, O. EDNA: a framework for plugin-based applications applied to X-ray  
972 experiment online data analysis. *J Synchrotron Radiat* **16**, 872-879,  
973 doi:10.1107/s0909049509036681 (2009).
- 974 83 Adams, P. D., Afonine, P. V., Bunkóczi, G., Chen, V. B., Davis, I. W., Echols, N.,  
975 Headd, J. J., Hung, L.-W., Kapral, G. J., Grosse-Kunstleve, R. W., McCoy, A. J.,  
976 Moriarty, N. W., Oeffner, R., Read, R. J., Richardson, D. C., Richardson, J. S.,  
977 Terwilliger, T. C. & Zwart, P. H. PHENIX: a comprehensive Python-based system for  
978 macromolecular structure solution. *Acta Crystallogr D Biol Crystallogr* **66**, 213-221,  
979 doi:10.1107/S0907444909052925 (2010).
- 980 84 Emsley, P., Lohkamp, B., Scott, W. G. & Cowtan, K. Features and development of  
981 Coot. *Acta Crystallogr D Biol Crystallogr* **66**, 486-501,  
982 doi:10.1107/S0907444910007493 (2010).
- 983 85 Moriarty, N. W., Grosse-Kunstleve, R. W. & Adams, P. D. *electronic Ligand Builder*  
984 *and Optimization Workbench (eLBOW)*: a tool for ligand coordinate and restraint  
985 generation. *Acta Crystallogr D Biol Crystallogr* **65**, 1074-1080,  
986 doi:10.1107/S0907444909029436 (2009).
- 987 86 Humphrey, W., Dalke, A. & Schulten, K. VMD: visual molecular dynamics. *J Mol*  
988 *Graph* **14**, 33-38, 27-38, doi:10.1016/0263-7855(96)00018-5 (1996).
- 989 87 Folch, J., Arsove, S. & Meath, J. A. Isolation of brain strandin, a new type of large  
990 molecule tissue component. *J Biol Chem* **191**, 819-831 (1951).
- 991 88 Ejsing, C. S., Sampaio, J. L., Surendranath, V., Duchoslav, E., Ekroos, K., Klemm, R.  
992 W., Simons, K. & Shevchenko, A. Global analysis of the yeast lipidome by  
993 quantitative shotgun mass spectrometry. *Proc Natl Acad Sci U S A* **106**, 2136-2141,  
994 doi:10.1073/pnas.0811700106 (2009).
- 995 89 Šakanovič, A., Hodnik, V. & Anderluh, G. Surface plasmon resonance for measuring  
996 Interactions of proteins with lipids and lipid membranes. *Methods Mol Biol* **2003**, 53-  
997 70, doi:10.1007/978-1-4939-9512-7\_3 (2019).
- 998

## Supplementary Information

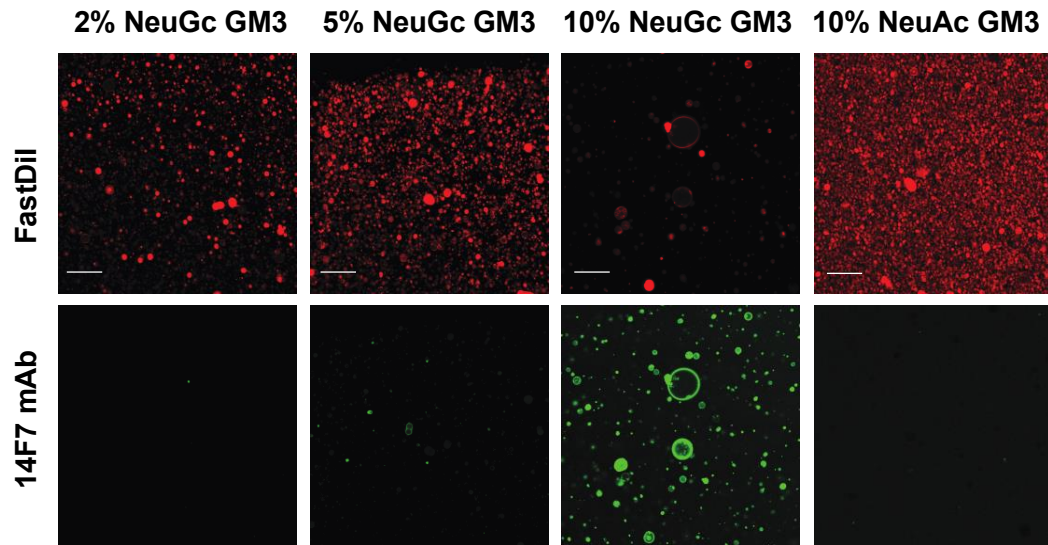

**Figure S1. Binding of 14F7 to GUVs composed of DOPC/Chol/GM3.** 14F7 was chemically labeled with Dylight-488 (green) and added to GUVs containing FastDiI as a membrane marker (red). While there was negligible interaction between 14F7 mAb and GUVs with 2 % and 5 % NeuGc GM3, 14F7 bound strongly to GUVs containing 10 % NeuGc GM3. No 14F7 mAb binding was observed for GUVs with 10 % NeuAc GM3. The scale bar corresponds to 20  $\mu$ m.

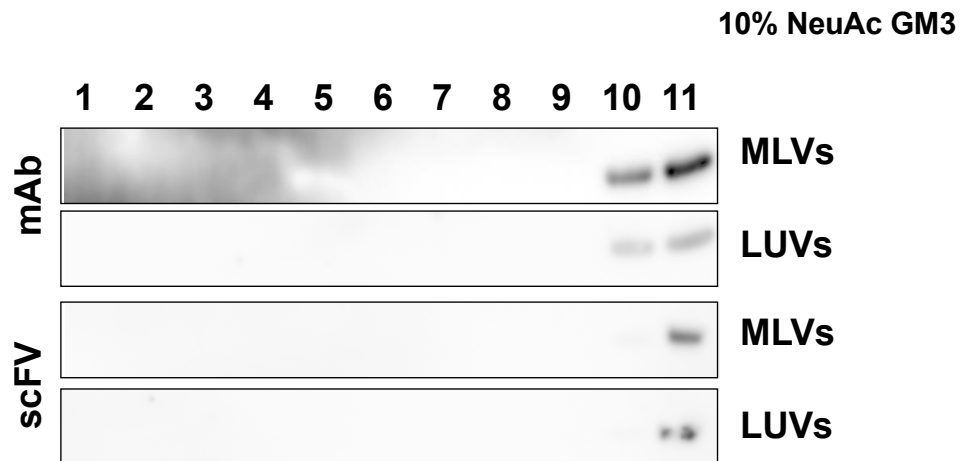

**Figure S2. Binding of 14F7 to LUVs and MLVs composed of 10 % NeuAc GM3/DOPC/ cholesterol in a flotation assay.** After centrifugation, 11 fractions were collected from the top. Proteins bound to vesicles accumulated in fractions 2-4. For all flotation assays with 10 % NeuAc GM3, the protein was located in the bottom fractions (10-11), where unbound proteins accumulate.

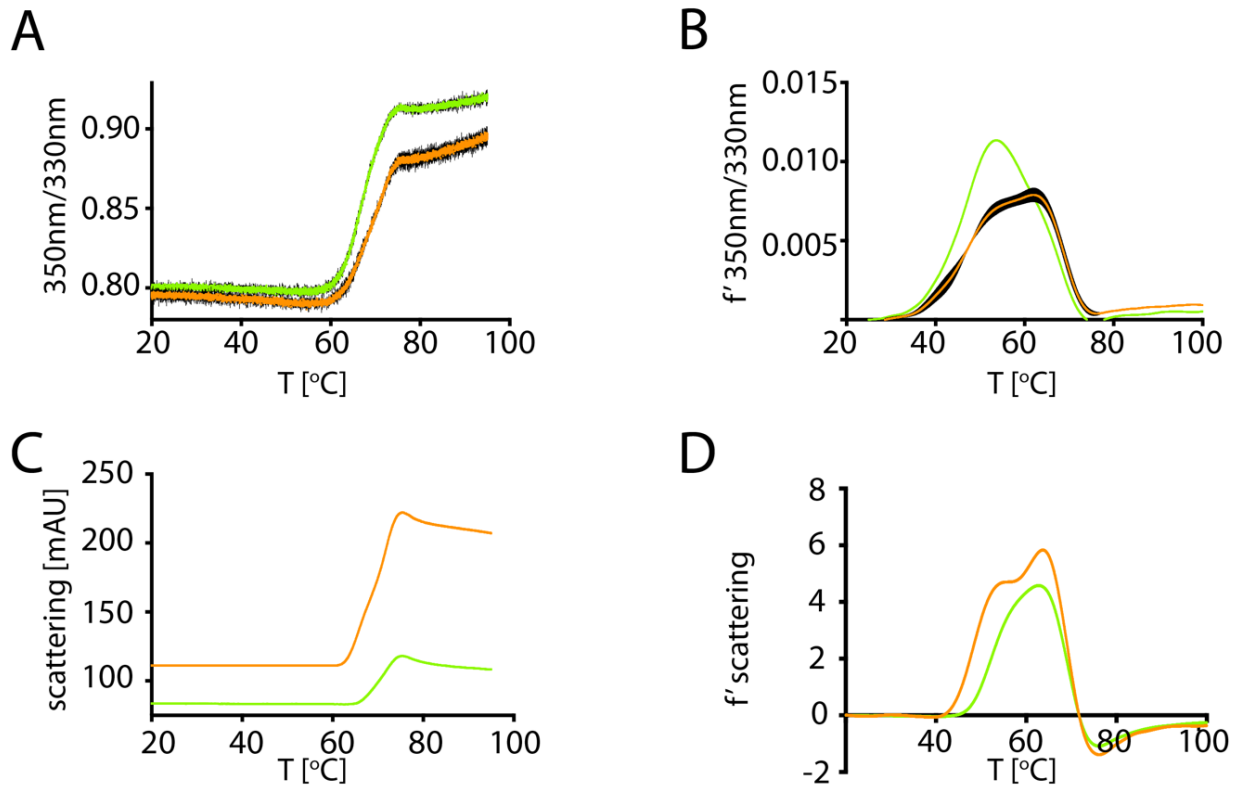

**Figure S3. nanoDSF measurements of native (green) and Dylight488-labeled (orange) 14F7 scFv.** **A** Thermal unfolding curves. **B** First derivative of unfolding curves. **C** Aggregation propensity curves. **D** First derivative of aggregation propensity curves.
